# 1 **Developmental Divergence of Sensory Stimulus Representation in**

## 2 **Cortical Interneurons**

3 Rahel Kastli<sup>1,3,5</sup>, Rasmus Vighagen<sup>1,3,5</sup>, Alexander van der Bourg<sup>1,3,5</sup>, Ali Ozgur Argunsah<sup>1,3,5</sup>,  
4 Asim Iqbal<sup>1,3</sup>, Fabian F. Voigt<sup>2,3</sup>, Daniel Kirschenbaum<sup>3,4</sup>, Adriano Aguzzi<sup>3,4</sup>, Fritjof  
5 Helmchen<sup>2,3</sup> and Theofanis Karayannis<sup>1,3,6,\*</sup>

6 <sup>1</sup>Laboratory of Neural Circuit Assembly, Brain Research Institute, University of Zurich  
7 Winterthurerstrasse 190, CH-8057 Zurich, Switzerland

8 <sup>2</sup>Laboratory of Neural Circuit Dynamics, Brain Research Institute, University of Zurich  
9 Winterthurerstrasse 190, CH-8057 Zurich, Switzerland

10 <sup>3</sup>Neuroscience Center Zurich, University of Zurich and ETH Zurich, Winterthurerstrasse 190,  
11 CH-8057 Zurich, Switzerland

12 <sup>4</sup>Institute of Neuropathology, University Hospital Zurich, Schmelzbergstrasse 12, CH-8091  
13 Zurich, Switzerland

14 <sup>5</sup>These authors contributed equally to this work

15 <sup>6</sup> Lead Contact

16 \* Correspondence: karayannis@hifo.uzh.ch

17

18 **Number of Figures: 5**

19 **Number of Supplementary Figures: 7**

20 **Abstract**

21 Two inhibitory cell types involved in modulating barrel cortex activity and perception during  
22 active whisking in adult mice, are the VIP<sup>+</sup> and SST<sup>+</sup> interneurons. Here we identify a  
23 developmental transition point of structural and functional rearrangements onto these  
24 interneuron types around the start of active sensation at P14. Using in vivo two-photon Ca<sup>2+</sup>  
25 imaging, we find that before P14, both interneuron types respond stronger to a multi-whisker  
26 stimulus, whereas after P14 their responses diverge, with VIP<sup>+</sup> cells losing their multi-  
27 whisker preference and SST<sup>+</sup> neurons enhancing theirs. Rabies virus tracings followed by  
28 tissue clearing, as well as photostimulation-coupled electrophysiology reveal that SST<sup>+</sup> cells  
29 receive higher cross-barrel inputs compared to VIP<sup>+</sup> at both time points. In addition, we also  
30 uncover that whereas prior to P14 both cell types receive direct input from the sensory  
31 thalamus, after P14 VIP<sup>+</sup> cells show reduced inputs and SST<sup>+</sup> cells largely shift to motor-  
32 related thalamic nuclei.

## 33 Introduction

34 Postnatal development and maturation of neuronal circuits responsible for sensory  
35 processing is fundamental for accurate representation of the environment as animals  
36 transition into actively interacting with the external world<sup>1</sup>. Unravelling the mechanisms of  
37 neocortical development is key for understanding the emergence of purposeful and goal-  
38 directed motor actions informed by sensory cues. It is therefore of great importance to study  
39 the alterations that sensory cortical networks undergo in responding to diverse sensory  
40 stimuli upon developmental behavioural transitions.

41 The whisker primary somatosensory cortex (wS1) of rodents is a well-suited model to study  
42 sensory processing throughout development due to the somatotopic way in which the  
43 information is transmitted from the whiskers to the cortex, as well as its role in spatial  
44 navigation<sup>2,3</sup>. Although the whiskers of mice are already present at the time of birth, during  
45 the first postnatal weeks the whisker pad only exhibits spontaneous muscle twitches, which  
46 coincide with activity in wS1<sup>4,5</sup>. Around postnatal day 14 (P14), mice start displaying bilateral  
47 rhythmic movements of the whiskers ('active whisking'), enabling them to explore their  
48 environment and extract more detailed information from their surrounding<sup>6-8</sup>.

49 Although the wS1 has been a subject of research for many decades, it is only recently that  
50 the role of inhibition in sensory processing in the adult cortex has started to be explored.  
51 Several studies showed that layer 2/3 (L2/3) vasoactive intestinal peptide-expressing (VIP<sup>+</sup>)  
52 interneurons (INs) in the wS1 can inhibit the inhibitory somatostatin-expressing (SST<sup>+</sup>) INs,  
53 thus leading to a net excitation of pyramidal cells (disinhibition)<sup>9-11</sup>. The same disinhibitory  
54 connectivity motif has also been described in other cortical areas, suggesting a general  
55 mechanism by which cortico-cortical loops can influence cortical processing<sup>12-16</sup>. In the wS1,  
56 this VIP<sup>+</sup>-SST<sup>+</sup> disinhibitory loop can be recruited in a top-down fashion by the whisker  
57 primary motor cortex (wM1), which directly innervates the wS1 VIP<sup>+</sup> INs in L2/3<sup>9</sup>. In addition  
58 it has been shown that VIP<sup>+</sup> INs can be activated by bottom-up thalamic inputs, potentially  
59 also engaging in disinhibition through SST<sup>+</sup> cells<sup>17-19</sup>. Nevertheless, a recent study reports

60 opposite results, with SST<sup>+</sup> cells being strongly activated by a whisker-driven sensory  
61 stimulus, compared to VIP<sup>+</sup> cells which are found to be silenced<sup>20</sup>. We hypothesized that the  
62 main reason behind this discrepancy between the aforementioned results is the stimulus  
63 paradigm used. Researchers either stimulated one single whisker<sup>11</sup> or multiple whiskers at  
64 the same time<sup>20</sup>- two paradigms that would engage the adult barrel cortex in very distinct  
65 ways. We further hypothesized that these interneurons would be very differently engaged by  
66 these stimulation paradigms prior to P14, when top-down modulation is absent and  
67 discrimination of fine features through the somatosensory system are probably not yet  
68 developed. When we tested these hypotheses, we indeed found that the strength of  
69 activation of VIP<sup>+</sup> and SST<sup>+</sup> INs depends on the nature of the presented stimulus. We find  
70 that compared to the single-whisker deflection, the multi-whisker stimulation leads to a  
71 higher activation of both cell types before P14, but after the onset of active whisking only  
72 SST<sup>+</sup> exhibit higher activation. Intriguingly, these response alterations are accompanied by a  
73 significant rearrangement of thalamic connections onto both VIP<sup>+</sup> and SST<sup>+</sup> INs in the same  
74 time window, later than any other thalamo-cortical connectivity restructuring reported to date.

## 75 **Results**

### 76 **Divergent sensory stimulus responses in superficial cortical VIP<sup>+</sup> and SST<sup>+</sup>** 77 **interneurons during development**

78 To assess how wS1 VIP<sup>+</sup> and SST<sup>+</sup> INs in L2/3 respond to whisker stimuli across  
79 development we performed acute *in vivo* two-photon calcium (Ca<sup>2+</sup>) imaging under light-  
80 anesthesia at two developmental time points; prior to the onset of active whisking (age: P8-  
81 12) and after the beginning of active whisking (age: P21-41, denoted as P21+). To visualize  
82 VIP<sup>+</sup> and SST<sup>+</sup> IN activity, we used animals expressing tdTomato in either VIP<sup>+</sup> or SST<sup>+</sup> INs  
83 (VIPCre-Ai14 and SSTCre-Ai14 lines, respectively) and injected the membrane-permeable  
84 AM-ester form of the Ca<sup>2+</sup> indicator OGB-1 into wS1. Two-photon Ca<sup>2+</sup> imaging was  
85 performed during spontaneous activity and upon stimulation of either the principal C2

86 whisker one time alone (single-whisker stimulation) or both the principal whisker and the  
87 majority of the macro vibrissae once together (multi-whisker stimulation) (**Figure 1b**)<sup>21</sup>.

88 We first tested whether VIP<sup>+</sup> and SST<sup>+</sup> INs are functionally integrated before P14 by  
89 examining their spontaneous activity. We observed prominent Ca<sup>2+</sup> transients in both IN  
90 types that correlated with the activity of the surrounding cells (**Figure 1c, Figure S1a**),  
91 indicating that they receive input capable of driving action potentials before the onset of  
92 active whisking. Previous studies have shown that cortical pyramidal neurons and superficial  
93 5HT3a<sup>+</sup> INs display highly correlated spontaneous activity within their population in early  
94 postnatal development and then undergo a de-correlation upon maturation of the circuit<sup>21–24</sup>.

95 To test if the same is true for VIP<sup>+</sup> and SST<sup>+</sup> INs we compared the correlations of  
96 spontaneous activity within each IN population before and after P14 and found a significant  
97 drop of co-activation with time (**Figure 1e**). Interestingly, at P21+, spontaneous activity of  
98 SST<sup>+</sup> cells is more correlated than that of VIP<sup>+</sup> cells, a phenomenon that has also been  
99 described in the visual cortex of adult mice (p<0.01, comparison not shown in the figure)<sup>25</sup>.

100 In addition, we compared the average correlation between SST<sup>+</sup> and VIP<sup>+</sup> INs and between  
101 the IN subtypes and their surrounding non-labeled cells, most likely excitatory neurons,  
102 again finding a similar decorrelation (**Figure S1a**).

103 Having established that VIP<sup>+</sup> and SST<sup>+</sup> INs are embedded in the developing circuit prior to  
104 P14, we next tested if they respond to whisker stimulation and if yes, how this would  
105 potentially change across development (**Figure 1b**). Since in a natural environment, both  
106 single and multiple whiskers can be deflected, we used both a single- and a multi whisker  
107 stimulus in both age groups, with the latter being even more relevant for neonatal mice,  
108 whose whiskers are physically closer together<sup>5</sup>.

109 As the response to a single-whisker stimulus in adult L2/3 VIP<sup>+</sup> and SST<sup>+</sup> INs has been  
110 described before by cell-attached electrophysiological recordings<sup>17</sup>, we first compared the  
111 activity of the two cell types in response to this stimulation paradigm. We found that at P21+

112 the peak  $\Delta F/F$  of the average  $Ca^{2+}$  response in  $SST^+$  INs was lower compared to that of  $VIP^+$   
113 INs, matching the published data<sup>17</sup> (**Figure S1b**). Nevertheless, when looking at the integral  
114 of  $\Delta F/F$  average response (over 8s following whisker stimulation) there was no significant  
115 difference between the two cell types (**Figure S1b**), and the same was true before P14  
116 (**Figure S1c**).

117 We then assessed how IN responses to multi- compared to single-whisker stimulation may  
118 change during development by comparing the  $\Delta F/F$  integral as an overall measure of direct  
119 or indirect activation of the cells by the sensory stimuli. The analysis showed that before the  
120 onset of active whisking (P8-12), both  $VIP^+$  and  $SST^+$  INs responded significantly stronger to  
121 multi- compared to single-whisker stimulation (**Figure 1d, f**). For the  $SST^+$  INs this continued  
122 to be the case and even enhanced after the onset of active whisking (P21+), while for the  
123  $VIP^+$  INs the  $\Delta F/F$  integral became similar between multi- versus single-whisker stimulation  
124 (**Figure 1f**). Since the  $Ca^{2+}$  transients recorded at P8-12 had a clear late component and a  
125 lower peak amplitude than the mature cells, we sought out to better understand how they  
126 relate to action potentials across development. We therefore filled  $SST^+$  INs with OGB-1 *in*  
127 *vitro* and evoked a set number of action potentials, while recording the  $Ca^{2+}$  transients in the  
128 cell bodies using two-photon microscopy. We found, that when comparing the  $\Delta F/F$   
129 responses between the two age groups, there was no significant difference detected,  
130 indicating that the integral of the  $Ca^{2+}$  responses can provide a good estimate for the  
131 functional activation of the cell types across development. Our results also suggest that the  
132 pronounced late component of the  $Ca^{2+}$  signal at P8-12 is not due to the differential  $Ca^{2+}$   
133 buffering capacities at the two age points, but rather due to the way the network activates  
134 the cells (**Figure S1d**).

135 To address if the sensory-evoked  $Ca^{2+}$  responses we observed for the cell types and stimuli  
136 across development carry information that can make them discriminatory, we trained three  
137 different decoders to quantify differences in response profiles. Each decoder was trained on  
138 a subset of  $Ca^{2+}$  responses, evoked through either multi- or single-whisker stimulation, for

139 each IN type and age. All of the classifiers showed above chance level values with VIPs  
140 displaying a reduction with age, whereas the SSTs an increase. This finding lends further  
141 support for the developmental divergence of these two cell type's activation and function  
142 **(Figure S1e)**.

143

#### 144 **Superficial VIP<sup>+</sup> and SST<sup>+</sup> interneurons show distinct barrel-field afferent connectivity** 145 **motifs**

146 Increased responsiveness to multi- over single-whisker stimulation at both ages could be  
147 due to cortico-cortical inputs originating from surrounding barrel columns, which would  
148 provide convergent excitation originating from multiple whiskers. We therefore aimed at  
149 investigating the presynaptic inputs onto L2/3 VIP<sup>+</sup> and SST<sup>+</sup> INs at the two developmental  
150 time points, using a monosynaptic rabies virus approach<sup>26</sup>. This allowed us to assess both  
151 local and long-range connectivity of the two IN types.

152 By utilizing compound mouse genetics (VIPCre-HTB or SSTCre-HTB), in combination with  
153 the pseudo-typed rabies virus, direct presynaptic partners of L2/3 VIP<sup>+</sup> and SST<sup>+</sup> INs were  
154 labeled with mCherry. The primary infected cells (starter cells) could be identified by double  
155 labeling of mCherry and eGFP (provided by the HTB line). The viral injections were done at  
156 either P5 or P15 and after 7 days the brains were collected (at P12 and P22 respectively). A  
157 CLARITY-based tissue clearing protocol was performed on the brains and they were  
158 subsequently imaged in their entirety using a custom-built light-sheet microscope  
159 (mesoSPIM) **(Figure 2a)**<sup>27</sup>. The auto-fluorescence of the barrels allowed for detection of the  
160 barrel field and enabled us to accurately localize our injection site within the wS1 **(Figure 2b-**  
161 **e and Figure S2)**. A second batch of injected brains was processed using classical  
162 histology, followed by eGFP immunostaining and widefield imaging. Both the cleared whole  
163 brain and the histology dataset were used to quantify the number and laminar position of the  
164 starter and the presynaptic cells located around the wS1 injection site. This dual approach

165 was performed to safeguard that no information was lost while clearing the brains. For the  
166 histology dataset, a subset of all cut sections and a manual approach was used to identify  
167 the cells, whereas in the cleared brains a deep-neural network was trained to detect and  
168 count cells<sup>28</sup>. For both methods, the results were highly comparable (**Figure S3**).

169 The analysis showed that although we see starter cells in L2-6 at both time points we get  
170 robust primary infection in L2/3 for both VIP<sup>+</sup> and SST<sup>+</sup> cells (**Figure S3a, b**). The distribution  
171 of the presynaptic cells across the layers mirrored that of the starter cells, with the VIP<sup>+</sup> INs  
172 receiving more inputs from the upper cortical layers while the SST<sup>+</sup> neurons more from the  
173 deeper layers (**Figure S3c, d**).

174 To assess if L2/3 SST<sup>+</sup> and VIP<sup>+</sup> INs receive a significant proportion of their inputs from  
175 neighboring barrels, the cleared 3D brain images were used to localize both starter and  
176 presynaptic cells within the barrel field (**Figure 2b-e, Figure S2a, b**). Only L2/3 presynaptic  
177 neurons located within wS1 were included in the analysis, since it is most likely that these  
178 inter-columnar inputs would originate from the upper layers<sup>29,30</sup>. As it is not possible to  
179 determine which presynaptic partner connects to which starter cell, a probabilistic approach  
180 was taken, where the distance between every starter to every presynaptic cell within 800 $\mu$ m  
181 distance was calculated and compared between the two cell types (**Figure S4**). The analysis  
182 revealed that SST<sup>+</sup>, compared to VIP<sup>+</sup> INs, receive on average more distant inputs, both  
183 before and after P14 (**Figure 2f**). To further validate the results and overcome the variability  
184 observed in the data we also calculated the cumulative distance distribution of randomly  
185 selected starter and presynaptic cells (**Figure S2c**) (Online Methods). This anatomical data  
186 can help explain why the SST<sup>+</sup> cells are able to report multi- over single-whisker activation  
187 both before and after P14. However, it cannot explain why the VIP<sup>+</sup> INs are able to  
188 differentiate between multi- and single-whisker stimulation before P14 and not after, unless  
189 there is a change in the functional connectivity.

190



191 **Distinct functional connectivity motifs onto superficial VIP<sup>+</sup> and SST<sup>+</sup> interneurons**

192 After revealing the anatomical connections of the wS1 cortical inputs onto superficial VIP<sup>+</sup>  
193 and SST<sup>+</sup> INs, we assessed their functionality and strength. Specifically, we investigated if  
194 after P14, SST<sup>+</sup> INs receive stronger functional input from lateral sources compared to VIP<sup>+</sup>  
195 INs, while before P14 they display more functionally similar input.

196 In order to investigate the developmental trajectory of VIP<sup>+</sup> and SST<sup>+</sup> IN intrinsic properties  
197 we performed whole-cell current-clamp recordings of L2/3 VIP<sup>+</sup> or SST<sup>+</sup> INs and analyzed  
198 their passive and active electrophysiological membrane properties (**Figure 3b, Figure S5a-**  
199 **e**). As expected, we found evidence of cell maturation in both cell types, with the membrane  
200 resistance decreasing and the action potentials becoming faster (**Figure S5a, d, e**).  
201 Nevertheless, the threshold for action potential generation dropped and action potential  
202 amplitude increased only in VIP<sup>+</sup> INs, (**Figure S5b, c**), suggesting that the SST<sup>+</sup> cells are  
203 closer to their mature state at P8-12.

204 In order to analyze the distribution of neurons providing synaptic input to the two IN types,  
205 we performed glutamate uncaging. This was carried out in a grid pattern onto wS1-  
206 containing brain slices while measuring evoked postsynaptic excitatory and inhibitory  
207 currents in L2/3 VIP<sup>+</sup> or SST<sup>+</sup> INs through whole-cell voltage-clamp recordings at -45mV  
208 (**Figure 3a**). With this approach, we mapped out the origin as well as the strength of  
209 incoming cortical connections at the two developmental stages investigated (P8-12 and  
210 P21+). We found that L2/3 SST<sup>+</sup> INs receive the majority of their excitatory input from within  
211 their own layer and that this is the case both before and after P14. These results fit well with  
212 the laminar patterns of excitatory inputs described for the L2/3 SST/CR<sup>+</sup> cells in adult mice<sup>30</sup>.  
213 The VIP<sup>+</sup> cells on the other hand receive almost equal amounts of excitatory inputs from all  
214 layers, with a decrease in L5/6 (**Figure 3c**). Because the photostimulation was carried out  
215 over a large field of view we were able to assess lateral activity originating from up to 500  
216  $\mu\text{m}$  away from either side of the IN cell body and therefore inputs coming from outside the

217 resident column. To compare our glutamate uncaging results to the rabies virus mapping,  
218 inputs located in the superficial layers (L1-3) were plotted in relation to their lateral distance  
219 from the recorded cell. In agreement with the rabies virus findings, the analysis showed that  
220 prior to P14 SST<sup>+</sup> INs receive excitatory inputs from more lateral sources compared to VIP<sup>+</sup>  
221 cells (**Figure 3d**). Even though this difference is reduced after P14, SST<sup>+</sup> INs still receive a  
222 higher proportion of excitatory inputs from further away compared to VIP<sup>+</sup> INs (**Figure 3d**).  
223 Interestingly, the VIP<sup>+</sup> INs receive more inhibition than the SST<sup>+</sup> INs from L2/3 both before  
224 and after P14, acting almost in an opposite fashion to the mapped incoming excitation  
225 (**Figure S5f, g**). Because glutamate uncaging could activate the receptors on the patched  
226 cell directly, and holding the cell at -45mV does not allow for a proper estimation of purely  
227 excitatory responses, a new set of photostimulation experiments was carried out in voltage-  
228 clamp mode at -70 mV, first without and then in the presence of tetrodotoxin (TTX). By  
229 subtracting the direct responses (in the presence of TTX) from the evoked excitatory ones,  
230 recorded before the addition of the drug, currents evoked exclusively from pre-synaptic  
231 neurons could be calculated (**Figure S5h, i**). The analysis of this new dataset showed that  
232 the SST<sup>+</sup> INs do indeed receive excitation from more distant sources compared to the VIP<sup>+</sup>  
233 cells within the superficial layers (**Figure 3d**).

234 The anatomical tracing data together with the functional incoming excitation data suggest  
235 that SST<sup>+</sup> INs receive more lateral excitation compared to VIP<sup>+</sup> cells at both developmental  
236 time points. This provides a plausible mechanism for the stronger activation of SST<sup>+</sup> INs by  
237 multi-whisker stimulation. In contrast, despite that VIP<sup>+</sup> cells also respond stronger to multi-  
238 compared to single-whisker stimuli before P14, no local cortical motif was detected that  
239 could help explain it. This suggests that the multi-whisker preference of VIP<sup>+</sup> cells could be  
240 enabled by activity originating from long-range thalamic sources.

241

242 **Rearrangement of thalamic inputs onto superficial VIP<sup>+</sup> and SST<sup>+</sup> interneurons during**  
243 **development**

244 Since the observed inter-barrel connectivity motifs are not able to fully explain the  
245 developmental changes in single- versus multi-whisker responses seen in the *in vivo* Ca<sup>2+</sup>  
246 imaging data, we turned our attention to bottom-up inputs coming from the thalamus, labeled  
247 by our rabies tracings. The analysis was facilitated by the preservation of the 3D architecture  
248 of the thalamus in the cleared whole brain dataset. Interestingly, we found that before P14,  
249 both VIP<sup>+</sup> and SST<sup>+</sup> INs had many presynaptic cells in the thalamus (**Figure 4a,c, Movie S1,**  
250 **Movie S3**). The autofluorescence of the samples allowed us to distinguish between different  
251 thalamic nuclei; especially the ventral posteromedial nucleus of the thalamus (VPM), the  
252 primary relay station to the wS1, which was easily identifiable due to its distinct barreloid  
253 structure. Using this nucleus as a reference, we found that the thalamic areas providing  
254 inputs to superficial VIP<sup>+</sup> and SST<sup>+</sup> cells before P14 are mainly the VPM and the posterior  
255 complex (PO), a higher order nucleus primarily innervating wS1 L1-3 and L5a, as well as  
256 wS2<sup>31</sup> (**Figure 4a, c, e, Movie S5, Movie S7**). Unexpectedly, we found a clear shift in the  
257 thalamic nuclei providing input to the SST<sup>+</sup> INs after P14. In contrast to prior P14, very few  
258 or no pre-synaptic partners were found in the VPM or PO, while many cells were labeled in  
259 the Ventro-Medial nucleus (VM) and the Ventro-Anterior nucleus (VAL) of the thalamus  
260 (**Figure 4d, e, Figure S7, Movie S4, Movie S8**). Interestingly, after P14 the VIP<sup>+</sup> INs did not  
261 seem to have any pre-synaptic partners in the thalamus (**Figure 4b, Movie S2, Movie S6**).  
262 This is in contrast to studies that have shown functional input from the thalamus onto VIP<sup>+</sup>  
263 cells in the adult cortex<sup>18,19,32</sup>. Since it is widely known that the rabies virus does not spread  
264 to all the pre-synaptic partners of a cell<sup>33-35</sup>, and in our case this could also be augmented by  
265 reduced expression of the glycoprotein from the HTB mouse line<sup>36</sup>, we believe that this result  
266 reflects a reduction in thalamic inputs rather than a complete loss. To examine this, we used  
267 two alternative approaches. First, as an alternative to the HTB mouse line, an AAV HTB  
268 helper virus was co-injected with the rabies virus at P15 in VIPCre mice. The animals were

269 sacrificed at P22 and the brains cleared and imaged as described above (n=3). Using this  
270 approach, we indeed detected a low number of pre-synaptic cells in the VPM and the PO  
271 (**Figure S7**). The second approach was to stain wS1-containing sections from VIPCre-  
272 tdTomato and SSTCre-tdTomato mice with the vesicular glutamate transporter 2 (VGlut2), a  
273 marker for thalamo-cortical terminals. This approach provides an independent validation of  
274 direct thalamo-cortical innervation onto superficially located VIP<sup>+</sup> and SST<sup>+</sup> INs, and in  
275 addition provides a measure of the strength of those inputs by means of number of  
276 synapses. To quantify the number of appositions, a custom-written program was used to  
277 analyze high-resolution confocal images (Online Methods). The analysis showed that prior to  
278 P14, VIP<sup>+</sup> INs had significantly more VGlut2 puncta than SST<sup>+</sup> INs, whereas after P14 the  
279 number of appositions onto VIP<sup>+</sup> INs dropped significantly (**Figure 4f**), evening out the  
280 difference between the two cell types. These histological results support the data obtained  
281 with the rabies-based mapping, and suggest that upon the onset of active whisking thalamic  
282 input onto VIP<sup>+</sup> INs is strongly reduced.

283 Overall, our data suggest a model by which the VIP<sup>+</sup> IN preference for multi-whisker  
284 stimulation before P14 is mainly supported by strong thalamo-cortical inputs that come from  
285 both VPM and PO. These inputs are significantly reduced after the onset of active whisking,  
286 together with the VIP<sup>+</sup> INs response to multi- versus single-whisker stimulation (**Figure 5**).  
287 For the SST<sup>+</sup> INs on the other hand, the preference for multi-whisker stimulation, both before  
288 and after P14 would be supported by the strong lateral inter-barrel connectivity, with a  
289 contribution of direct VPM and PO-derived excitation prior to P14 (**Figure 5**).

## 290 **Discussion**

291 This study investigates the engagement of VIP<sup>+</sup> and SST<sup>+</sup> INs by sensory stimuli, and the  
292 underlying circuits they are embedded in before and after the onset of active whisking (P14).

293 We initially hypothesized that in the juvenile mouse wS1, VIP<sup>+</sup> and SST<sup>+</sup> cells would be  
294 differentially activated by a single- versus a multi-whisker deflection respectively, based also

295 on published reports<sup>11,20</sup>. By testing the activation pattern of the same population of INs for  
296 the two types of stimuli, we found support for our hypothesis. Juvenile VIP<sup>+</sup> INs responded in  
297 the same manner whether a single or multiple whiskers were deflected, even though prior to  
298 P14 they responded much stronger to the multi-whisker stimulus. Juvenile SST<sup>+</sup> cells on the  
299 other hand responded stronger to the multi-whisker stimulus, which was also the case before  
300 P14. Even though in this study we have not directly examined the connectivity between  
301 these two interneuron types, recently published work in the adult mice showed strong layer-  
302 dependent effects after VIP<sup>+</sup> neuron Channelrhodopsin-based activation<sup>20</sup>. Specifically, the  
303 authors reported that L2-4 excitatory neurons did not increase their firing rate upon VIP<sup>+</sup>  
304 neuron activation, suggesting that the recruitment of the VIP-SST inhibitory loop is layer- and  
305 most likely also stimulus-dependent. On the other hand the same study suggests that upon  
306 active whisking and stimulation of multiple whiskers, SST<sup>+</sup> cells are strongly activated,  
307 whereas VIP<sup>+</sup> INs are inhibited, with a delay that matches the activation of SST<sup>+</sup> neurons.  
308 These results are in line with the reciprocity of the connections between the two IN types<sup>12</sup>,  
309 and together with our data suggest that the di-synaptic disinhibitory VIP-SST connection is  
310 engaged in a dynamic manner, with one cell inhibiting the other, the directionality of which is  
311 context-dependent.

312 Developmentally, the robust activation of both VIP<sup>+</sup> and SST<sup>+</sup> INs prior to P14 by the multi-  
313 compared to the single-whisker stimulus, suggests that even if the connectivity between VIP<sup>+</sup>  
314 and SST<sup>+</sup> cells is present at this time point, it seems to be overridden by the overall strong  
315 excitation provided by thalamo-cortical inputs onto both IN types. It is interesting to note that  
316 the Ca<sup>2+</sup> transients recorded before P14 upon, especially multi-whisker stimulation, are  
317 slower and more prolonged compared to after P14. There are a number of potential  
318 mechanisms that could have explained this phenomenon such as action potential speed  
319 leading to a slower intracellular Ca<sup>2+</sup> rise in the cytoplasm or altered buffering and/or  
320 extrusion capacities. Nevertheless, we do not detect significant changes over development  
321 in the Ca<sup>2+</sup> transients of SST<sup>+</sup> INs recorded *in vitro* upon action potential discharge, rather

322 suggesting that reverberating networks could underlie the generation of multiple action  
323 potentials spread across time and underlie the slower  $\text{Ca}^{2+}$  transients. This may be  
324 especially the case when multiple whiskers are deflected. In this case, the signal would  
325 activate the VPM, which through direct connections activate the  $\text{VIP}^+$  and  $\text{SST}^+$  INs. In  
326 addition to this early activation, there would be a later wave of activity onto INs via the  
327 engagement of a parallel pathway, consisting of a loop between wS1 and  $\text{PO}^{37,38}$ , leading to  
328 the prolonged  $\text{Ca}^{2+}$  transient component. Nevertheless, our wS1 distance-dependent  
329 anatomical and functional connectivity suggests that the cross-barrel circuit is also a  
330 contributor to the multi-whisker preference of  $\text{SST}^+$  cells, both before and after P14. We find  
331 that excitation coming from lateral cross-barrel domains is stronger onto  $\text{SST}^+$  compared to  
332  $\text{VIP}^+$  cells at both time points, whereas inhibition from within layers 2/3 is stronger onto  $\text{VIP}^+$   
333 cells. This higher inhibition onto the latter cells, could be originating from multiple types of  
334 presynaptic GABAergic cells, including other  $\text{VIP}^+$  cells, reelin-expressing interneurons<sup>39</sup> or  
335 even  $\text{SST}^+$  cells, as suggested by Yu et al.<sup>20</sup>

336 At the same time, we find a striking developmental change in bottom-up thalamic inputs onto  
337  $\text{SST}^+$  INs. Whereas prior to active whisking they receive the majority of inputs from the  
338 sensory-related nuclei VPM and PO, after the onset of active whisking their thalamic inputs  
339 shift to motor-related nuclei, such as the VM and the VAL. A study by Wall et al., that  
340 combined AAV helper virus and monosynaptic rabies virus to trace the inputs onto inhibitory  
341 INs in the adult S1, showed that the VPM and PO strongly project to  $\text{SST}^+$  INs, while the  
342 motor-related nuclei only showed few presynaptic cells<sup>40</sup>. However, it is important to note  
343 that in our experiments we get very few starter cells in the main thalamo-recipient layer (L4)  
344 compared to the abovementioned study. Additionally, due the usage of whole brain clearing  
345 and the autofluorescence of the thalamic barreloids (VPM), we have been able to very  
346 precisely assign cells to different thalamic nuclei, which could have been mis-assigned to  
347 more rostral VPM using histological approaches.

348 Interestingly, another study that reported the in-vivo activity of SST<sup>+</sup> neurons in adult animals  
349 showed that they do not receive strong inputs from the VPM<sup>20,32</sup>. The authors suggested that  
350 SST<sup>+</sup> INs may be recruited rather by local excitatory inputs, which fits well with our cortical  
351 connectivity results onto these interneurons. However, we can certainly not exclude that  
352 some of the SST<sup>+</sup> activation comes from different thalamic nuclei such as VM and VAL.  
353 These nuclei are in fact known to project to the striatum, L1 of motor-related cortical areas,  
354 the cingulate as well as the prefrontal cortex<sup>41-45</sup>. A proportion of VM cells also have axonal  
355 collaterals to S1, the target specificity of which was until this study unknown<sup>46,47</sup>. AAV  
356 tracings from the Allen Mouse Brain Connectivity Atlas ([http://connectivity.brain-](http://connectivity.brain-map.org/projection)  
357 [map.org/projection](http://connectivity.brain-map.org/projection)) show that axonal projections from the VM exclusively target L1 of the  
358 somatosensory cortex. This strongly suggests that the connection we uncover with the  
359 rabies tracing is formed between VM and L2/3 SST<sup>+</sup> cells as they are known to extend their  
360 dendrites into L1<sup>48</sup>. Furthermore, the VM is activated during whisking events, as assessed by  
361 *in vivo* photometry with GCaMP6<sup>49</sup>, suggesting that it is involved in reporting whisker-related  
362 information which it would pass on to the superficial SST<sup>+</sup> INs.

363 Notwithstanding the underlying mechanisms, both VIP<sup>+</sup> and SST<sup>+</sup> INs show greater  
364 responses upon multi- compared to single-whisker stimulation before P14. Together with our  
365 anatomical data, this indicates that the functional impact of bottom-up input onto VIP<sup>+</sup> cells  
366 decreases and becomes more specific after P14. We would speculate that this decrease  
367 coincides with the emergence of top-down modulation from wM1 to allow these cells to act  
368 as coincident detectors between active whisking and touch of individual whiskers. The SST<sup>+</sup>  
369 INs on the other hand would be preferentially activated if multiple whiskers are deflected  
370 simultaneously. We would argue that the ability of SST<sup>+</sup> INs to differentiate between single-  
371 and multi-whisker stimuli in the juvenile wS1, suggests that these cells act antagonistically to  
372 the activation of VIP<sup>+</sup> cells, depending on how each whisker is deflected in relation to their  
373 neighboring ones. We would speculate that upon complex navigation or object exploration,  
374 in some parts of the wS1 SST<sup>+</sup> activation would take over, while VIP<sup>+</sup> cells would be more



375 engaged in other parts. Therefore, our results support a model that upon the onset of active  
376 whisking, VIP<sup>+</sup> and SST<sup>+</sup> INs diversify their functions to be able to register multiple aspects  
377 of the environment and hence help facilitate appropriate motor outputs.

378

## 379 **Methods**

### 380 **Animals**

381 All animal experiments were approved by the Cantonal Veterinary Office Zurich and followed  
382 Swiss national regulations. Animal lines used in this study are: VIP-IRES-Cre  
383 (Vip<sup>tm1(cre)Zjh/J</sup>)<sup>50</sup>, SST-IRES-Cre (Sst<sup>tm2.1(cre)Zjh/J</sup>)<sup>50</sup> Ai14 (B6;129S6-Gt(ROSA)26Sor<sup>tm14(CAG-</sup>  
384 tdTomato)<sup>Hze/J</sup>)<sup>51</sup> and HTB (Gt(ROSA)26Sor<sup>tm1(CAG-neo,-HTB)Fhg</sup>)<sup>52</sup>.

385

### 386 **Animal surgery and preparation for in vivo imaging experiments**

387 We used 6 VIPCre-tdTomato and 6 SSTCre-tdTomato mice (7 males, 5 females) at ages  
388 ranging from P8 to P41 for two-photon Ca<sup>2+</sup> imaging. Mice were sedated with  
389 chlorprothixene (0.1g/kg, intraperitoneal (i.p.); Sigma-Aldrich Chemie GmbH, Buchs,  
390 Switzerland) and lightly anesthetized with urethane (0.25–0.5g/kg, i.p.). Atropine (0.3 mg/kg;  
391 Sigma-Aldrich Chemie GmbH, Buchs, Switzerland) and dexamethasone (2 mg/kg;  
392 aniMedica GmbH, Senden-Bösensell, Germany) were administered subcutaneously (s.c.) to  
393 reduce secretion of saliva and to prevent edema (s.c. injection 30 min after induction of  
394 anesthesia). The body temperature was maintained at 37° C with a heating pad. Hydration  
395 levels were checked regularly and maintained by s.c. injections of Ringer-lactate (Fresenius  
396 Freeflex; Fresenius Kabi AG, Oberdorf, Switzerland). The depth of anesthesia was  
397 evaluated throughout the experiment by testing the pinch reflex on the forepaw. A custom-  
398 built head plate was glued to the skull over the left hemisphere with dental cement (Paladur,



399 Heraeus Kulzer GmbH Hanau, Germany; Caulk Grip Cement for electrophysiology) to  
400 secure and stabilize the animal.

401 A small cranial window of 1.5x1.5 mm<sup>2</sup> was opened above the center of the mapped barrel  
402 columns with a sharp razor blade and superfused with Ringer's solution (in mM: 145 NaCl,  
403 5.4 KCl, 10 HEPES, 1 MgCl<sub>2</sub>, 1.8 CaCl<sub>2</sub>; pH 7.2 adjusted with NaOH). Care was taken not to  
404 damage the dura or surface blood vessels in young animals. In animals older than P20, we  
405 removed the dura to prevent blockage of the glass pipette tip during insertion into the cortex  
406 for two-photon guided Ca<sup>2+</sup> indicator loading.

407

### 408 **Intrinsic optical imaging**

409 The principal whisker-related barrel column was identified using optical imaging of intrinsic  
410 signals. The cortical surface was visualized through the intact bone by surface application of  
411 normal Ringer's solution and a glass coverslip placed on top. The skull surface above the  
412 barrel cortex was left intact for animals younger than P12, but thinned in older animals.  
413 Reference images of the cortical blood vessel pattern were visualized by a 546-nm LED to  
414 enhance contrast. Functional maps of the target barrel column C2 were obtained by shining  
415 red light (630 nm LED) on the cortical surface while stimulating the C2 whisker with a  
416 galvanometer (10 Hz for 2s at 1140°/s amplitude in rostro-caudal direction<sup>21</sup>). Reflectance  
417 images were collected through a 4x objective with a CCD camera (Scientifica SciCam Pro;  
418 14-bit; 2-by-2-pixel binning, 680x512 binned pixels at 31 fps). Functional intrinsic signal  
419 images were computed as fractional reflectance changes relative to the pre-stimulus  
420 average (average of 10 trials). The intrinsic signal image obtained for the C2 barrel column  
421 was then mapped to the blood vessel reference image and used to guide the location of the  
422 craniotomy and Ca<sup>2+</sup> imaging.

423

### 424 **Galvanometer-driven whisker stimulation**

425 Whisker stimulation was performed with a two galvanometer-driven stimulation<sup>21</sup>. One  
426 stimulation fiber was attached to the C2 whisker considering variations in resting position  
427 angles and relative anterior-posterior shifts. The second stimulator was positioned closer to  
428 the whisker pad and a small holder perpendicular to the fiber arm was added for multi-  
429 whisker stimulation. For single principal whisker stimulation only the first fiber was moved,  
430 whereas for multi-whisker deflection, both the fibers were moved at the same time. The  
431 stimulation fibers were fixed and secured with Plasticine on top of a custom-built holder plate  
432 and secured and translated with a micro-manipulator. Deflections were applied in the rostro-  
433 caudal direction and one single pulse consisting of a phase-shifted 100 Hz cosine with 1140  
434 °/s peak velocity was applied through either one or both galvanometer-driven stimulators.

435

#### 436 **In vivo two-photon calcium imaging**

437 Neuronal ensembles in superficial layers of the principal whisker barrel field mapped by  
438 intrinsic signal imaging were bolus-loaded with the AM ester form of Oregon Green BAPTA-1  
439 by pressure injection (OGB-1; 1 mM solution in Ca<sup>2+</sup>-free Ringer's solution; 2-min injection at  
440 150-200 μm depth) as described previously<sup>53</sup>. The craniotomy was then filled with agarose  
441 (type III-A, 1% in Ringer's solution; Sigma) and covered with an immobilized glass plate.  
442 Two-photon Ca<sup>2+</sup> imaging was performed with a Scientifica HyperScope two-photon laser  
443 scanning microscope one hour after bolus loading using a Ti:sapphire laser system at 900  
444 nm excitation (Coherent Chameleon; approx. 120 femtosecond laser pulses). Two-channel  
445 fluorescence images of 256x128 pixels at 11.25 Hz (HyperScope galvo-mode) were  
446 collected with a 16x water-immersion objective lens (Nikon, NA 0.8). 3 to 5 separate spots  
447 (i.e. Figure 1C top row) have been imaged per animal. Per imaging spot, both a 300s-long  
448 continuous recording of spontaneous activity as well as 10 trials of 20s-long evoked activity  
449 recorded for each of single- and multi-whisker stimulation paradigms. Data acquisition was  
450 controlled by ScanImage<sup>54</sup>. Duration of Ca<sup>2+</sup> imaging recordings varied between 3 to 4 hours.

451

## 452 **Analysis of calcium imaging data**

453 Ca<sup>2+</sup> imaging data were imported and analysed using routines custom-written in MATLAB.  
454 First, fluorescence image time-series for a given region were concatenated. The  
455 concatenated imaging data was then aligned using a cross-correlation based subpixel  
456 registration algorithm<sup>55</sup> to correct for translational drift (registered on red tdTomato channel  
457 and transferred to OGB-1 channel). Average intensity projections of the imaging data were  
458 used as reference images to manually annotate regions of interest (ROIs) corresponding to  
459 individual neurons. Neurons with somata partly out-of-focus were not included. Ca<sup>2+</sup> signals  
460 were expressed as the mean pixel value of the relative fluorescence change  $\Delta F/F = (F - F_0)/F_0$   
461 in each given ROI.  $F_0$  was calculated as the bottom 5% of the fluorescence trace. Neuropil  
462 patches surrounding each neuron is defined by all pixels not assigned to a neuronal soma or  
463 astrocyte of the corresponding neuron ROI annotation<sup>56</sup> (A disk shaped region around the  
464 neuron of interest with excluding any intersecting neighboring neuronal ROI). Neuropil  
465 correction is performed as  $F_{\text{corrected}} = F_{\text{neuron}} - \alpha * F_{\text{neuropil}}$ . Alpha is estimated for each  
466 imaging spot separately using the formula  $F_{\text{blood\_vessel}}/F_{\text{surrounding\_neuropil}}$ <sup>57</sup>. For each stimulus,  
467 the evoked responses of 10 trials were analyzed and the response magnitude expressed as  
468 the mean of the evoked  $\Delta F/F$  integral (%·s; integral of the first 8s response starting at  
469 stimulus onset). Pearson's correlation coefficients of sensory-evoked responses for any two  
470 neurons at zero lag were calculated for each single trial evoked calcium traces in a 17.4s  
471 window starting from stimulus onset. Spontaneous correlations were calculated by averaging  
472 correlations of 1000 randomly segmented 17.4s-long pieces from a 300s long spontaneous  
473 recording, to get rid of the trace length dependent correlation fluctuations for the comparison  
474 of spontaneous and evoked correlations.

475

## 476 **Decoders**

477 Three different decoders were trained either for the multi- or single-whisker stimulation  
478 paradigm, to quantify the decoding capacities of the SSTs and the VIPs at P8-P12 and

479 P21+. The decoders used were random forest, naïve Bayes and Error-correcting output  
480 codes (ECOC) that classified a cell type into one out of two groups based on baseline-  
481 subtracted average stimulus response trials.<sup>58</sup> Each classifier was trained 1000 times by  
482 randomly setting 70% of the data for training (Matlab function TreeBagger, with  
483 parameters  $N_{\text{trees}} = 50$ , minleaf = 5; fitcnb and fitcecoc, respectively). For each trained set,  
484 30% of the remaining data was used to calculate classification accuracy.

485

486

### 487 **Acute slice electrophysiology**

488 Whole-cell patch-clamp electrophysiological recordings were performed on either SSTCre-  
489 tdTomato<sup>+</sup> or VIPCre-tdTomato<sup>+</sup> cells in L2/3 of the wS1, in acute slices prepared from P8-  
490 12 or P21+ animals.

491 Animals were anesthetized, decapitated, the brain extracted and transferred to 4°C  
492 physiological Ringer's solution (aCSF), of the following composition (mM): 125 NaCl, 2.5  
493 KCl, 25 NaHCO<sub>3</sub>, 1.25 NaH<sub>2</sub>PO<sub>4</sub>, 1 MgCl<sub>2</sub>, 2 CaCl<sub>2</sub> and 20 glucose. The brain was then  
494 glued to a stage and cut into 300 µm-thick coronal slices using a vibratome (VT 1200S,  
495 Leica). The slices recovered in room temperature aCSF for 30 min before recording. The  
496 slices were then placed in the recording chamber of an upright microscope (Axioscope 2 FS,  
497 Zeiss) and superfused with 32°C oxygenated (95% O<sub>2</sub> and 5% CO<sub>2</sub>) aCSF at a rate of 2-3  
498 ml/min. The microscope was equipped with immersion differential interference contrast (DIA)  
499 and the following objectives were used to visualize the cells (10x/0.3, Olympus & 40x/0.8,  
500 Zeiss). A CMOS camera (optiMOS, QImaging) was attached to the scope to visualize the  
501 slice and cells through a computer screen. A white-light source (HAL 100, Zeiss) and a LED  
502 based excitation source (Polygon400, Mightex Systems) in combination with a tdTomato  
503 filter set (set 43 HE, Zeiss, Excitation 550/25, Emission 605/70) were used to locate the

504 fluorescent INs. Patch pipettes were pulled from borosilicate glass capillaries (1.5 OD x 0.86  
505 ID x 75 L mm, Harvard Apparatus) at a resistance of 4-6 M $\Omega$ .

506 For recordings of intrinsic electrophysiological properties and photostimulation-evoked  
507 currents, Clampex was used (v10.7.0.3, Molecular Devices 2016). The recording pipettes  
508 were filled with a solution containing the following (mM): 135 potassium D-gluconate, 4 NaCl,  
509 0.3 Na-GTP, 5 Mg-ATP, 12 phosphocreatine-di-tris, 10 HEPES, 0.0001 CaCl<sub>2</sub> (pH 7.25,  
510 mOsm 290). In all cases 3 mg/ml biocytin (Tocris) was added in the recording solution and  
511 no extra pharmacology was added. Access resistance was constantly monitored to ensure  
512 the quality and stability of the recording. The recorded data were accepted only if the initial  
513 series resistance was less than or equal to 25 M $\Omega$  and did not change by more than 20%  
514 throughout the recording period. Compensation was made for the pipette and cell  
515 capacitance.

516 We used a similar stimulation protocol as previously reported<sup>59,60</sup>. For each analyzed cell,  
517 passive and active membrane properties were recorded in current-clamp mode at -65 mV by  
518 applying a series of linearly increasing hyperpolarizing and depolarizing sub- and supra-  
519 threshold current steps (500 ms,  $\Delta$ +20 pA). The analysis of intrinsic properties was done in  
520 Clampfit (v10.7.0.3, Molecular Devices 2016). Using this protocol, we analyzed the cells for  
521 5 different parameters: For calculating the membrane resistance, we used the  $R=V/I$  on  
522 hyperpolarizing pulses that did not lead to an activation of voltage-dependent conductances;  
523 Spike threshold was obtained as the inflection point of a rapid change in  $dV/dt$  of the first  
524 spike evoked at the step protocol. The spike height was from the threshold voltage point to  
525 the maximum value of the peak. Spike width was calculated as the width at half of the  
526 maximum amplitude; Afterhyperpolarization amplitude was measured from spike threshold to  
527 the lowest occurrence point after the repolarization phase of the spike.

528 All intrinsic electrophysiology data presented in the manuscript are average and all statistical  
529 comparisons have been done using a Mann-Whitney U test.

530

### 531 **In vitro Calcium transient and AP correlation**

532 Whole-cell patch-clamping of SSTCre-tdTomato<sup>+</sup> neurons of L2/3 in wS1 was performed at  
533 P8-12 and P21+. Patch pipette was filled with 100  $\mu$ M OGB-1 and right after breaking in to  
534 patched cell, an incubation period of 25 min took place to let the OGB-1 equilibrate within the  
535 cell body. A square pulse current was injected giving rise to a set number of APs (#1, 3, 5, 7  
536 & 10), while simultaneously recording the evoked Ca<sup>2+</sup> transient from the somata, using a  
537 Scientifica SliceScope two-photon laser microscope and a laser system at 900 nm  
538 excitation. Two-channel fluorescent images of 256x128 pixels at 11.25 Hz (HyperScope  
539 galvo-mode) were collected with a 40x water-immersion objective lens. The  $\Delta F/F$  of the  
540 gathered Ca<sup>2+</sup> responses per a given number of APs were analyzed in terms of the Ca<sup>2+</sup>  
541 transient max amplitude, decay tau and integral. The Averages of these parameters were  
542 taken and compared between the two age groups, P8-12 and P21+.

543

### 544 **Glutamate uncaging and data analysis**

545 For photostimulation experiments, whole-cell patch-clamp recordings were performed on  
546 randomly selected INs in L2/3 and using a 10x objective lens (Olympus, NA 0.3, 1048 x  
547 1960  $\mu$ m field of view). For light stimulation, the tissue was digitally divided into 400  
548 subregions making up a grid pattern, spanning all cortical layers. The tissue was submerged  
549 in oxygenated aCSF containing caged glutamate (295  $\mu$ M RuBi-Glutamate, Tocris) and  
550 photostimulation was performed at least 3 times at each spot, in a pseudorandom manner.  
551 Photostimulation parameters were calibrated beforehand so that the experimental paradigm  
552 successfully evoked a short train of ~4 APs in randomly selected putative pre-synaptic  
553 partners of the recorded cells. The average time of the evoked APs in putative pre-synaptic  
554 neurons were used as a window of analysis for the responses evoked within the patched INs  
555 (**Figure 3a**). This time-window was used to capture majority of mono-synaptic activity and to

556 minimize the presence of poly-synaptic. Although, when performing the glutamate uncaging,  
557 the activation of presynaptic partners through photostimulation never resulted in AP elicited  
558 currents within the postsynaptic patched cell, suggesting that the contribution of polysynaptic  
559 activity would be small. Recordings of synaptic activity were performed in voltage clamp  
560 mode at -45 mV (to register both excitatory and inhibitory currents), with a sampling rate of  
561 10 kHz<sup>61-63</sup>.

562 Custom-written Matlab script was used to analyze the photostimulation evoked current data.  
563 Within the data gathered at -45 mV, the excitatory currents were extracted by taking all  
564 activity registered below baseline (average of the signal within 500 ms before illumination)  
565 within the analysis window, while inhibitory currents were all activity above baseline.

566 For each recording, the field of view was segmented per layer and the average activity within  
567 each layer was normalized to the overall average activity within the whole field of view.  
568 Mann-Whitney U test was carried out for all data points within each layer and comparison  
569 was made between lamina.

570 For the lateral activity analysis, the average activity within L2/3 was calculated per given  
571 distance from each recorded cells soma. The average was then calculated for all recordings  
572 within a given group. Two-tailed t-test was used to look for significance between groups and  
573 points with same given distance from soma.

574 A second set of photostimulation experiments were performed on SSTCre-tdTomato<sup>+</sup> or  
575 VIPCre-tdTomato<sup>+</sup> cells in L2/3 of the wS1, in acute slices prepared from P8-12 animals.  
576 This set of glutamate uncaging experiments was performed in same manner as described  
577 above but at -70 mV, to allow to selectively detect only incoming excitatory currents to our  
578 recorded cells. When a first round of photostimulation had been carried out, 1  $\mu$ M TTX  
579 (Tetrodotoxin citrate, Tocris) was added to the circulating aCSF and 12 min after, the same  
580 glutamate uncaging experiment was performed. Through custom-written Matlab script we  
581 then subtracted the values obtained before from after TTX to calculate the extent of the  
582 synaptically evoked responses originating from pre-synaptic partners alone, rather than

583 direct stimulation of the recorded cell. When performing this analysis only evoked activity  
584 originating from the superficial layers were considered.

585

## 586 **Immunohistochemistry**

587 For the immunohistochemistry experiments, the Ai14 reporter mouse line was combined with  
588 either VIPCre or SSTCre. The offspring were sacrificed at either P9-12 (before onset of  
589 active whisking) or at >P21 (after the onset of active whisking). In short, the animals were  
590 anesthetized before being transcardially perfused with ice-cold 1x PBS followed by 4% PFA.  
591 The brains were then dissected and post-fixed in ice-cold 4% PFA for 1h before being  
592 placed in a 30% Sucrose solution at 4°C for >24h. Following this cryo-protection step the  
593 brains were embedded in OCT using a peel-away mold and then stored at -80°C. Coronal  
594 20µm-thick brain sections that contained the barrel cortex were cut and collected on-slide  
595 (wS1) using a cryostat (Leica, CM3050 S). The slides were then stored at -80°C until further  
596 processing. For labeling thalamic input onto the tdTomato expressing cells an antibody  
597 staining was performed. For blocking, 0.75µL of PBS with 0.1% TritonX and 1.5% normal  
598 donkey serum was applied on the slide and left for 1h at RT. Both primary and secondary  
599 antibodies were diluted in the same blocking solution. The primary, rabbit αVGlut2 (1:500,  
600 SySy 135 402), was left on the slide overnight (>17h) at 4°C while the secondary, donkey  
601 αrabbit488 (1:1000, Thermo Fisher A21206), was left for 2h at RT. The slides were then  
602 coverslipped using VectaShield Gold and stored at 4°C for imaging.

603

## 604 **Confocal imaging and image processing of immunohistochemical samples**

605 The slides were imaged using a Confocal Microscope (Olympus FV1000). All images were  
606 taken from L2/3 of the barrel cortex and of each of the processed brain 8-10 stacks were  
607 generated. To image the VGlut2 puncta a 60x oil-immersion objective was used and stacks  
608 were taken at 0.47µm distance.



609 A custom MATLAB script was used to analyze the VGlut2-tdTomato colocalization. The  
610 algorithm worked as follow: Image de-noising was performed using Wiener filtering followed  
611 by 2-D bilateral filtering. Wiener filter performs 2-D adaptive noise-removal resulting in a low  
612 pass filtered version of an intensity image that has been corrupted by stationary additive  
613 noise<sup>64</sup> that is estimated based on statistics at a local neighborhood of each pixel.  
614 The bilateral filter is an edge-preserving nonlinear filter that smoothens a signal while  
615 preserving strong edges<sup>65</sup>. After de-noising, Z-stacks were binarized using multilevel Otsu  
616 thresholding<sup>66</sup> for each xy-, xz- and yz- slices separately, resulting in 3 binary 3D-stacks  
617 combined using logical AND operator (This very stringent binarisation operation makes sure  
618 the detected signal is noise free). Finally 3D binarized stacks for channel 1 (VGlut2) and 2  
619 (VIP- or SST-tdTomato) were combined with another AND operator and 3D connected  
620 components analysis<sup>67</sup> was used to count number of co-localizations. Number of co-  
621 localizations was normalized by total tdTomato signal for each image.

622

### 623 **Viral injections**

624 For these experiments the HTB reporter line was crossed with either VIP-Cre or SST-Cre.  
625 The pups were injected with ASLV-A envelope glycoprotein (EnvA)-pseudotyped,  
626 glycoprotein-deleted rabies virus SADG-mCherry(EnvA)<sup>26</sup> at either P4/P5 or P15. All pups  
627 were injected with 100nl of the virus, 120-170um deep into the barrel field of the primary  
628 somatosensory cortex. The injections were done using a glass micropipette attached to a  
629 Nanolitre 2010 pressure injection apparatus (World Precision Instruments). After the  
630 surgeries, the animals were returned to their home-cage for 7 days to allow for adequate  
631 viral expression.

632 For the control rabies virus experiments VIPCre pups aged P15 were injected with 100nl of a  
633 1:1 mix of pAAV-hSyn-FLEX-TVA-P2A-EGFP-2A-oG (gift from John Naughton, Addgene  
634 plasmid # 85225) and rabies virus (see above). The injections were done at the same depth

635 and using the same equipment as described above. The animals were sacrificed 7days after  
636 the injection and all the brains were cleared as described below.

637

### 638 **Tissue processing after viral injections**

639 Seven days after the rabies virus injection the animals were transcardially perfused using  
640 4% PFA. Following that the brain were either processed for immunohistochemistry as  
641 described above or for tissue clearing. For immunohistochemistry the whole brain was cut at  
642 20um using a cryostat (Leica, CM3050 S) and collected on slide. Every third of the collected  
643 sections was stained with GFP (abcam, ab13970, 1:1000) to enhance the HTB signal.

644 The method used for hydrogel-based tissue clearing is described in detail elsewhere<sup>68-70</sup>. In  
645 short, the brains were post-fixed for 48 hours in a Hydrogel solution (1% PFA, 4%  
646 Acrylamide, 0.05% Bis)<sup>68,69</sup> before the Hydrogel polymerization was induced at 37°C.  
647 Following the polymerisation the brains were immersed in 40mL of 8% SDS and kept  
648 shaking at room temperature until the tissue was cleared sufficiently (10-40 days depending  
649 on the age of the animals). Finally, after 2-4 washes in PBS, the brains were put into a self-  
650 made refractive index matching solution (RIMS)<sup>71</sup> for the last clearing step. They were left to  
651 equilibrate in 5mL of RIMS for at least 4 days at RT before being imaged.

652

### 653 **Imaging of rabies injected brains**

654 A Slidescanner (Zeiss, AxioScan Z1) was used to image the stained sections. Mosaic  
655 images of the injected hemisphere were taken using a 20x objective. The obtained pictures  
656 were processed for analysis using the ZEN Software and Fiji.

657 After clearing, brains were attached to a small weight and loaded into a quartz cuvette, then  
658 submerged in RIMS and imaged using a home-built mesoscale selective plane illumination  
659 microscope mesoSPIM<sup>27</sup>. The microscope consists of a dual-sided excitation path using a  
660 fiber-coupled multiline laser combiner (405, 488, 515, 561, 594, 647 nm, Omicron SOLE-6)

661 and a detection path comprising an Olympus MVX-10 zoom microscope with a 1x objective  
662 (Olympus MVPLAPO 1x), a filter wheel (Ludl 96A350), and a scientific CMOS (sCMOS)  
663 camera (Hamamatsu Orca Flash 4.0 V3). For imaging mCherry and eGFP a 594 nm  
664 excitation with a 594 long-pass filter (594 LP Edge Basic, AHF) and 488 nm & 520/35  
665 (BrightLine HC, AHF) were used respectively. The excitation paths also contain galvo  
666 scanners (GCM-2280-1500, Citizen Chiba) for light-sheet generation and reduction of  
667 streaking artifacts due to absorption of the light-sheet. In addition, the beam waist is  
668 scanning using electrically tunable lenses (ETL, Optotune EL-16-40-5D-TC-L) synchronized  
669 with the rolling shutter of the sCMOS camera. This axially scanned light-sheet mode (ASLM)  
670 leads to a uniform axial resolution across the field-of-view of 5-10  $\mu\text{m}$  (depending on zoom &  
671 wavelength). Field of views ranged from 10.79 mm at 1.25x magnification (Pixel size: 5.27  
672  $\mu\text{m}$ ) for overview datasets to 3.27 mm at 4x (Pixel size: 1.6  $\mu\text{m}$ ). Further technical details of  
673 the mesoSPIM are described elsewhere ([www.mesospim.org](http://www.mesospim.org)). The images generated with  
674 the mesoSPIM were further processed using the Fiji and the Imaris software.

675

#### 676 **Analysis of cleared tissue imaging data**

677 Close-up stacks taken from the barrel cortex of rabies injected and cleared SSTCre-HTB  
678 and VIPCre-HTB brains were initially processed through ImageJ and z-stacked samples of  
679 superficial and deeper layers were saved after intensity thresholding. In each brain, barrels  
680 were segmented from layer 4 by drawing the vectors on barrels through scalar vector  
681 graphics' software (BoxySVG). Afterwards, automated neuron (starter- and presynaptic  
682 cells) detection was performed on maximum intensity projections of L2/3 green (HTB) and  
683 red (Pre-synaptic partners) through a Deep Neural Network-based method, DeNeRD<sup>28</sup>.  
684 Initially, selected brain sections of high-resolution are segmented into smaller images by  
685 equally dividing the brain section into 100 $\times$ 100 smaller sections, whereas each smaller  
686 image contains  $\sim$ 20 neurons. After annotating the neurons in a subset of these images  
687 (total=160), 2/3rd of them are randomly drawn for training and 1/3rd for testing purpose. A  
688 Simple Graphical User Interface (SiGUI) software, developed in MATLAB, is used to

689 generate the ground-truth labels. Ground truth labels were generated by human experts who  
690 annotated the bounding boxes on top of the neurons. After generating the annotation, these  
691 brain images were fed to the DeNeRD for training the deep neural network (DNN). Four  
692 steps training procedure is applied that includes: (i) Training of the Region Proposal Network  
693 (RPN), (ii) Use the RPN from (i) to train a fast RCNN, (iii) Retraining RPN by sharing weights  
694 with fast RCNN of (ii). Finally, (iv) Retraining Fast RCNN using updated RPN. Epoch size of  
695 500 is used with initial learning rate of  $1 \times 10^{-5}$  of  $1 \times 10^{-6}$  in stages (i-ii) and (iii-iv)  
696 respectively. Training is performed by using NVIDIA Quadro P4000 GPU. The network is  
697 trained by minimizing the multi-task loss which corresponds to the each labeled Region of  
698 Interest, ROI (i.e. neuronal body) through stochastic gradient descent algorithm. The  
699 average precision (F1 score) of 0.9 was achieved on the testing dataset. After the DNN is  
700 trained, each brain section from the barrel region is serially passed through the DNN and  
701 neuron segmentation is performed.

702 Then, the 2D Euclidean distance between each starter cell and each of the pre-synaptic cells  
703 present within a  $800\mu\text{m}$  distance was measured using a custom MATLAB code. Plotted was  
704 the cumulative distribution of the distance for every starter cell as well as the average  
705 cumulative distribution of the percentage (probability) of pre-synaptic partners at a given  
706 Euclidian distance from the center of starter cells.

707 Additional analysis was performed by randomizing the selection of starter and presynaptic  
708 cells in the barrel cortex images of each cleared brain. We started by taking the original  
709 number of starter cells and randomly selecting the number of presynaptic cells that matches  
710 the observed ratio between the two cell groups for each brain. Ten iterations were performed  
711 and the Euclidean distance between each starter and presynaptic cell was measured.  
712 Subsequently, the number of starter cells was decreased by one and the above process was  
713 repeated until only one starter cell was left. For each iteration, the cumulative distance  
714 distribution was calculated and plotted.

715

## 716 **Statistical analysis**

717 Data are represented as mean  $\pm$  s.e.m. unless stated otherwise. Statistical comparisons  
718 have been done using a paired Wilcoxon-signed rank test for paired data and two-tailed  
719 Mann-Whitney *U*-test for non-paired data. A Kolmogorov-Smirnov test was applied to  
720 statistically compare the cumulative distribution of the distance between starter cells and  
721 pre-synaptic partners. Two-tailed t-test was used to analyze the distance analysis of the  
722 glutamate uncaging evoked responses in L2/3. Significance threshold was set to  $p < 0.05$ ; in  
723 the figures, different degrees of evidence against the null hypothesis are indicated by  
724 asterisks ( $p < 0.05$ : \*;  $p < 0.01$ : \*\*;  $p < 0.001$ : \*\*\*).

725

## 726 **Data and Code availability**

727 Data and Custom written codes are available upon reasonable request.

728

## 729 **References**

- 730 1. Ko, H. *et al.* The emergence of functional microcircuits in visual cortex. *Nature* **496**,  
731 96–100 (2013).
- 732 2. Van Der Loos, H. & Woolsey, T. A. Somatosensory cortex: Structural alterations  
733 following early injury to sense organs. *Science (80-. )*. **179**, 395–398 (1973).
- 734 3. Killackey, H. P. Anatomical evidence for cortical subdivisions based on vertically  
735 discrete thalamic projections from the ventral posterior nucleus to cortical barrels in  
736 the rat. *Brain Res.* **51**, 326–331 (1973).
- 737 4. Khazipov, R. *et al.* Early motor activity drives spindle bursts in the developing  
738 somatosensory cortex. *Nature* **432**, 758–761 (2004).
- 739 5. Akhmetshina, D., Nasretdinov, A., Zakharov, A., Valeeva, G. & Khazipov, R. The

- 740 Nature of the Sensory Input to the Neonatal Rat Barrel Cortex. *J. Neurosci.* **36**, 9922–  
741 9932 (2016).
- 742 6. Arakawa, H. & Erzurumlu, R. S. Role of whiskers in sensorimotor development of  
743 C57BL/6 mice. *Behav. Brain Res.* **287**, 146–155 (2015).
- 744 7. Landers, M. & Philip Zeigler, H. Development of rodent whisking: Trigeminal input and  
745 central pattern generation. *Somatosens. Mot. Res.* **23**, 1–10 (2006).
- 746 8. Welker, W. I. Analysis of Sniffing of the Albino Rat 1). *Behaviour* **22**, 223–244 (1964).
- 747 9. Lee, S., Kruglikov, I., Huang, Z. J., Fishell, G. & Rudy, B. A disinhibitory circuit  
748 mediates motor integration in the somatosensory cortex. *Nat. Neurosci.* **16**, 1662–  
749 1670 (2013).
- 750 10. Muñoz, W., Tremblay, R., Levenstein, D. & Rudy, B. Layer-specific modulation of  
751 neocortical dendritic inhibition during active wakefulness. *Science* **355**, 954–959  
752 (2017).
- 753 11. Gentet, L. J. *et al.* Unique functional properties of somatostatin-expressing GABAergic  
754 neurons in mouse barrel cortex. *Nat. Neurosci.* **15**, 607–612 (2012).
- 755 12. Pfeffer, C. K., Xue, M., He, M., Huang, Z. J. & Scanziani, M. Inhibition of inhibition in  
756 visual cortex: the logic of connections between molecularly distinct interneurons. *Nat.*  
757 *Neurosci.* **16**, 1068–1076 (2013).
- 758 13. Pi, H.-J. J. *et al.* Cortical interneurons that specialize in disinhibitory control. *Nature*  
759 **503**, 521–4 (2013).
- 760 14. Karnani, M. M. *et al.* Opening Holes in the Blanket of Inhibition: Localized Lateral  
761 Disinhibition by VIP Interneurons. *J. Neurosci.* **36**, 3471–3480 (2016).
- 762 15. Pinto, L. & Dan, Y. Cell-Type-Specific Activity in Prefrontal Cortex during Goal-  
763 Directed Behavior. *Neuron* **87**, 437–451 (2015).

- 764 16. Fu, Y. *et al.* A cortical circuit for gain control by behavioral state. *Cell* **156**, 1139–1152  
765 (2014).
- 766 17. Sachidhanandam, S., Sermet, B. S. & Petersen, C. C. H. Parvalbumin-Expressing  
767 GABAergic Neurons in Mouse Barrel Cortex Contribute to Gating a Goal-Directed  
768 Sensorimotor Transformation. *Cell Rep.* **15**, 700–706 (2016).
- 769 18. Audette, N. J., Urban-Ciecko, J., Matsushita, M. & Barth, A. L. POm Thalamocortical  
770 Input Drives Layer-Specific Microcircuits in Somatosensory Cortex. *Cereb. Cortex* 1–  
771 17 (2017) doi:10.1093/cercor/bhx044.
- 772 19. Williams, L. E. & Holtmaat, A. Higher-Order Thalamocortical Inputs Gate Synaptic  
773 Long-Term Potentiation via Disinhibition. *Neuron* 1–12 (2018)  
774 doi:10.1016/j.neuron.2018.10.049.
- 775 20. Yu, J., Hu, H., Agmon, A. & Svoboda, K. Recruitment of GABAergic Interneurons in  
776 the Barrel Cortex during Active Tactile Behavior. *Neuron* 1–16 (2019)  
777 doi:10.1016/j.neuron.2019.07.027.
- 778 21. van der Bourg, A. *et al.* Layer-Specific Refinement of Sensory Coding in Developing  
779 Mouse Barrel Cortex. *Cereb. Cortex* **27**, 4835–4850 (2017).
- 780 22. Golshani, P. *et al.* Internally Mediated Developmental Desynchronization of  
781 Neocortical Network Activity. *J. Neurosci.* **29**, 10890–10899 (2009).
- 782 23. Che, A. *et al.* Layer I Interneurons Sharpen Sensory Maps during Neonatal  
783 Development. *Neuron* **99**, 98-116.e7 (2018).
- 784 24. Ikezoe, K., Tamura, H., Kimura, F. & Fujita, I. Decorrelation of sensory-evoked  
785 neuronal responses in rat barrel cortex during postnatal development. *Neurosci. Res.*  
786 **73**, 312–320 (2012).
- 787 25. Karnani, M. M. M. *et al.* Cooperative Subnetworks of Molecularly Similar Interneurons

- 788 in Mouse Neocortex. *Neuron* **90**, 86–100 (2016).
- 789 26. Wickersham, I. R. *et al.* Monosynaptic Restriction of Transsynaptic Tracing from  
790 Single, Genetically Targeted Neurons. *Neuron* **53**, 639–647 (2007).
- 791 27. Voigt, F. F. *et al.* The mesoSPIM initiative: open-source light-sheet microscopes for  
792 imaging cleared tissue. *Nat. Methods* (2019) doi:10.1038/s41592-019-0554-0.
- 793 28. Iqbal, A., Sheikh, A. & Karayannis, T. DeNeRD: high-throughput detection of neurons  
794 for brain-wide analysis with deep learning. *Sci. Rep.* **9**, 1–13 (2019).
- 795 29. Adesnik, H., Bruns, W., Taniguchi, H., Huang, Z. J. & Scanziani, M. A neural circuit for  
796 spatial summation in visual cortex. *Nature* **490**, 226–230 (2012).
- 797 30. Xu, X. & Callaway, E. M. Laminal Specificity of Functional Input to Distinct Types of  
798 Inhibitory Cortical Neurons. *J. Neurosci.* **29**, 70–85 (2009).
- 799 31. Zhang, W. & Bruno, R. M. High-order thalamic inputs to primary somatosensory  
800 cortex are stronger and longer lasting than cortical inputs. *Elife* **8**, 1–22 (2019).
- 801 32. Sermet, B. S. *et al.* Pathway-, layer-and cell-type-specific thalamic input to mouse  
802 barrel cortex. *Elife* **8**, 1–28 (2019).
- 803 33. Ciabatti, E., González-Rueda, A., Mariotti, L., Morgese, F. & Tripodi, M. Life-Long  
804 Genetic and Functional Access to Neural Circuits Using Self-Inactivating Rabies  
805 Virus. *Cell* **170**, 382-392.e14 (2017).
- 806 34. Kim, E. J., Jacobs, M. W., Ito-Cole, T. & Callaway, E. M. Improved Monosynaptic  
807 Neural Circuit Tracing Using Engineered Rabies Virus Glycoproteins. *Cell Rep.* **15**,  
808 692–699 (2016).
- 809 35. Reardon, T. R. *et al.* Rabies Virus CVS-N2cδG Strain Enhances Retrograde Synaptic  
810 Transfer and Neuronal Viability. *Neuron* **89**, 711–724 (2016).



- 811 36. Tuncdemir, S. N. *et al.* Early Somatostatin Interneuron Connectivity Mediates the  
812 Maturation of Deep Layer Cortical Circuits. *Neuron* **89**, 521–535 (2016).
- 813 37. Deschênes, M., Veinante, P. & Zhang, Z. W. The organization of corticothalamic  
814 projections: Reciprocity versus parity. *Brain Res. Rev.* **28**, 286–308 (1998).
- 815 38. Groh, A., de Kock, C. P. J., Wimmer, V. C., Sakmann, B. & Kuner, T. Driver or  
816 Coincidence Detector: Modal Switch of a Corticothalamic Giant Synapse Controlled  
817 by Spontaneous Activity and Short-Term Depression. *J. Neurosci.* **28**, 9652–9663  
818 (2008).
- 819 39. Jiang, X. *et al.* Principles of connectivity among morphologically defined cell types in  
820 adult neocortex. *Science (80-. ).* **350**, (2015).
- 821 40. Wall, N. R. *et al.* Brain-Wide Maps of Synaptic Input to Cortical Interneurons. *J.*  
822 *Neurosci.* **36**, 4000–4009 (2016).
- 823 41. Arbuthnott, G. W., MacLeod, N. K., Maxwell, D. J. & Wright, A. K. Distribution and  
824 synaptic contacts of the cortical terminals arising from neurons in the rat ventromedial  
825 thalamic nucleus. *Neuroscience* **38**, 47–60 (1990).
- 826 42. Collins, D. P., Anastasiades, P. G., Marlin, J. J. & Carter, A. G. Reciprocal Circuits  
827 Linking the Prefrontal Cortex with Dorsal and Ventral Thalamic Nuclei. *Neuron* **98**,  
828 366-379.e4 (2018).
- 829 43. Chevalier, G. & Deniau, J. M. Disinhibition as a basic process in the expression of  
830 striatal functions. II. The striato-nigral influence on thalamocortical cells of the  
831 ventromedial thalamic nucleus. *Brain Res.* **334**, 227–233 (1985).
- 832 44. Jones, E. G. & Leavitt, R. Y. Retrograde axonal transport and the demonstration of  
833 non-specific projections to the cerebral cortex and striatum from thalamic intralaminar  
834 nuclei in the rat, cat and monkey. *J. Comp. Neurol.* **154**, 349–377 (1974).

- 835 45. Cruikshank, S. J. *et al.* Thalamic control of layer 1 circuits in prefrontal cortex. *J.*  
836 *Neurosci.* **32**, 17813–23 (2012).
- 837 46. Herkenham, M. The afferent and efferent connections of the ventromedial thalamic  
838 nucleus in the rat. *J. Comp. Neurol.* **183**, 487–517 (1979).
- 839 47. Kuramoto, E. *et al.* Two types of thalamocortical projections from the motor thalamic  
840 nuclei of the rat: A single neuron-tracing study using viral vectors. *Cereb. Cortex* **19**,  
841 2065–2077 (2009).
- 842 48. Ma, Y., Hu, H., Berrebi, A. S., Mathers, P. H. & Agmon, A. Distinct subtypes of  
843 somatostatin-containing neocortical interneurons revealed in transgenic mice. *J.*  
844 *Neurosci.* **26**, 5069–5082 (2006).
- 845 49. Sych, Y., Chernysheva, M., Sumanovski, L. T. & Helmchen, F. High-density multi-fiber  
846 photometry for studying large-scale brain circuit dynamics. *Nat. Methods* **16**, (2019).
- 847 50. Taniguchi, H. *et al.* A Resource of Cre Driver Lines for Genetic Targeting of  
848 GABAergic Neurons in Cerebral Cortex. *Neuron* **71**, 995–1013 (2011).
- 849 51. Madisen, L. *et al.* A robust and high-throughput Cre reporting and characterization  
850 system for the whole mouse brain. *Nat. Neurosci.* **13**, 133–140 (2010).
- 851 52. Li, Y. *et al.* Molecular layer perforant path-associated cells contribute to feed-forward  
852 inhibition in the adult dentate gyrus. - Supporting Information. *Proc. Natl. Acad. Sci. U.*  
853 *S. A.* **110**, 9106–11 (2013).
- 854 53. Stosiek, C., Garaschuk, O., Holthoff, K. & Konnerth, A. In vivo two-photon calcium  
855 imaging of neuronal networks. *Proc. Natl. Acad. Sci. U. S. A.* **100**, 7319–7324 (2003).
- 856 54. Pologruto, T. A., Sabatini, B. L. & Svoboda, K. ScanImage: flexible software for  
857 operating laser scanning microscopes. *Biomed. Eng. Online* **2**, 13 (2003).
- 858 55. Guizar-Sicairos, M., Thurman, S. T. & Fienup, J. R. Efficient subpixel image

- 859 registration algorithms. *Opt. Lett.* **33**, 156 (2008).
- 860 56. Peron, S., Chen, T. W. & Svoboda, K. Comprehensive imaging of cortical networks.  
861 *Curr. Opin. Neurobiol.* **32**, 115–123 (2015).
- 862 57. Kerlin, A. M., Andermann, M. L., Berezovskii, V. K. & Reid, R. C. Broadly Tuned  
863 Response Properties of Diverse Inhibitory Neuron Subtypes in Mouse Visual Cortex.  
864 *Neuron* **67**, 858–871 (2010).
- 865 58. Khan, A. G. *et al.* Distinct learning-induced changes in stimulus selectivity and  
866 interactions of GABAergic interneuron classes in visual cortex. *Nat. Neurosci.* **21**,  
867 851–859 (2018).
- 868 59. Miyoshi, G. *et al.* Genetic Fate Mapping Reveals That the Caudal Ganglionic  
869 Eminence Produces a Large and Diverse Population of Superficial Cortical  
870 Interneurons. *J. Neurosci.* **30**, 1582–1594 (2010).
- 871 60. Kawaguchi, Y. Physiological subgroups of nonpyramidal cells with specific  
872 morphological characteristics in layer II/III of rat frontal cortex. *J. Neurosci.* **15**, 2638–  
873 55 (1995).
- 874 61. Shepherd, G. M. G., Polgruto, T. A. & Svoboda, K. Circuit analysis of experience-  
875 dependent plasticity in the developing rat barrel cortex. *Neuron* **38**, 277–289 (2003).
- 876 62. Anastasiades, P. G. *et al.* GABAergic interneurons form transient layer-specific  
877 circuits in early postnatal neocortex. *Nat. Commun.* **7**, (2016).
- 878 63. Callaway, E. M. & Katz, L. C. Photostimulation using caged glutamate reveals  
879 functional circuitry in living brain slices. *Proc. Natl. Acad. Sci.* **90**, 7661–7665 (1993).
- 880 64. Lim, J. S. *Two-Dimensional Signal and Image Processing*. (Prentice-Hall, Inc. Upper  
881 Saddle River, NJ, USA, 1990).
- 882 65. Tomasi, C. & Manduchi, R. Bilateral filtering for gray and color images. *Sixth Int. Conf.*

- 883            *Comput. Vis. (IEEE Cat. No.98CH36271)* 839–846 (1998)
- 884            doi:10.1109/ICCV.1998.710815.
- 885    66.    Otsu, N. A Threshold Selection Method from Gray-Level Histograms. *IEEE Trans.*
- 886            *Syst. Man. Cybern.* **9**, 62–66 (1979).
- 887    67.    Ronse, C. & Devijver, P. A. *Connected components in binary images: the detection*
- 888            *problem.* (John Wiley & Sons, Inc. New York, NY, USA, 1984).
- 889    68.    Chung, K. *et al.* Structural and molecular interrogation of intact biological systems.
- 890            *Nature* **497**, 332–7 (2013).
- 891    69.    Ye, L. *et al.* Wiring and Molecular Features of Prefrontal Ensembles Representing
- 892            Distinct Experiences. *Cell* **165**, 1776–1788 (2016).
- 893    70.    Tomer, R., Ye, L., Hsueh, B. & Deisseroth, K. Advanced CLARITY for rapid and high-
- 894            resolution imaging of intact tissues. *Nat. Protoc.* **9**, 1682–97 (2014).
- 895    71.    Yang, B. *et al.* Single-cell phenotyping within transparent intact tissue through whole-
- 896            body clearing. *Cell* **158**, 945–958 (2014).

897

## 898    **Acknowledgement**

899    We thank O. Hanley for the production of the pseudotyped rabies virus used in this study, A.

900    Engmann and the Salk Institute for providing the cell lines for this production, P. Bethge for

901    his help with the 2P setup, H. Kasper and M. Wieckhorst for technical assistance and O.

902    Weinmann for his advice on immunostainings. We would also like to thank L. Egolf for her

903    assistance with the VIPCre, SSTCre and Ai14 mouse lines. Slidescanner imaging and data

904    analysis was performed with equipment maintained by the Center for Microscopy and Image

905    Analysis (ZMB), University of Zurich. We thank C. Aemisegger at the ZMB for her assistance

906    with the Slidescanner. This work was supported by grants from the European Research

907 Council (ERC, 679175, T.K and 670757, F.H), the Swiss National Science Foundation  
908 (SNSF, 31003A\_170037, T.K), Fond zur Förderung des Akademischen Nachwuchs of the  
909 UZH Alumni (T.K) and the Swiss Foundation for Excellence in Biomedical Research (R.K  
910 and T.K)

#### 911 **Author Contributions**

912 R.K. performed the anatomical mapping, tissue clearing, immunohistochemistry and wrote  
913 the manuscript; R.V. performed functional electrophysiology experiments, *in vitro* Ca<sup>2+</sup>  
914 imaging, contributed to the analysis of *in vitro* electrophysiological data and wrote the  
915 manuscript; A.v.d.B. performed *in vivo* Ca<sup>2+</sup> imaging experiments and initial virus injections;  
916 A.O.A. performed the analysis of the *in vivo* Ca<sup>2+</sup> imaging data, puncta co-localization in  
917 histology, analysis of the *in vitro* electrophysiology data and decoder analysis; A.I. did the  
918 analysis of the rabies-traced cells and the their distribution in the cortex. F.F.V. built,  
919 provided access to and guidance for the light-sheet microscope, F.H. provided access to the  
920 Light-Sheet Microscope and a two-photon microscope. D.K. and A.A. provided initial  
921 guidance on tissue clearing. T.K. conceptualized the study, designed the experiments and  
922 wrote the manuscript.

923

#### 924 **Additional Information**

925 Supplementary Figures S1-S7

926 Supplementary Movies S1-S8

927 The authors declare no competing interests

928

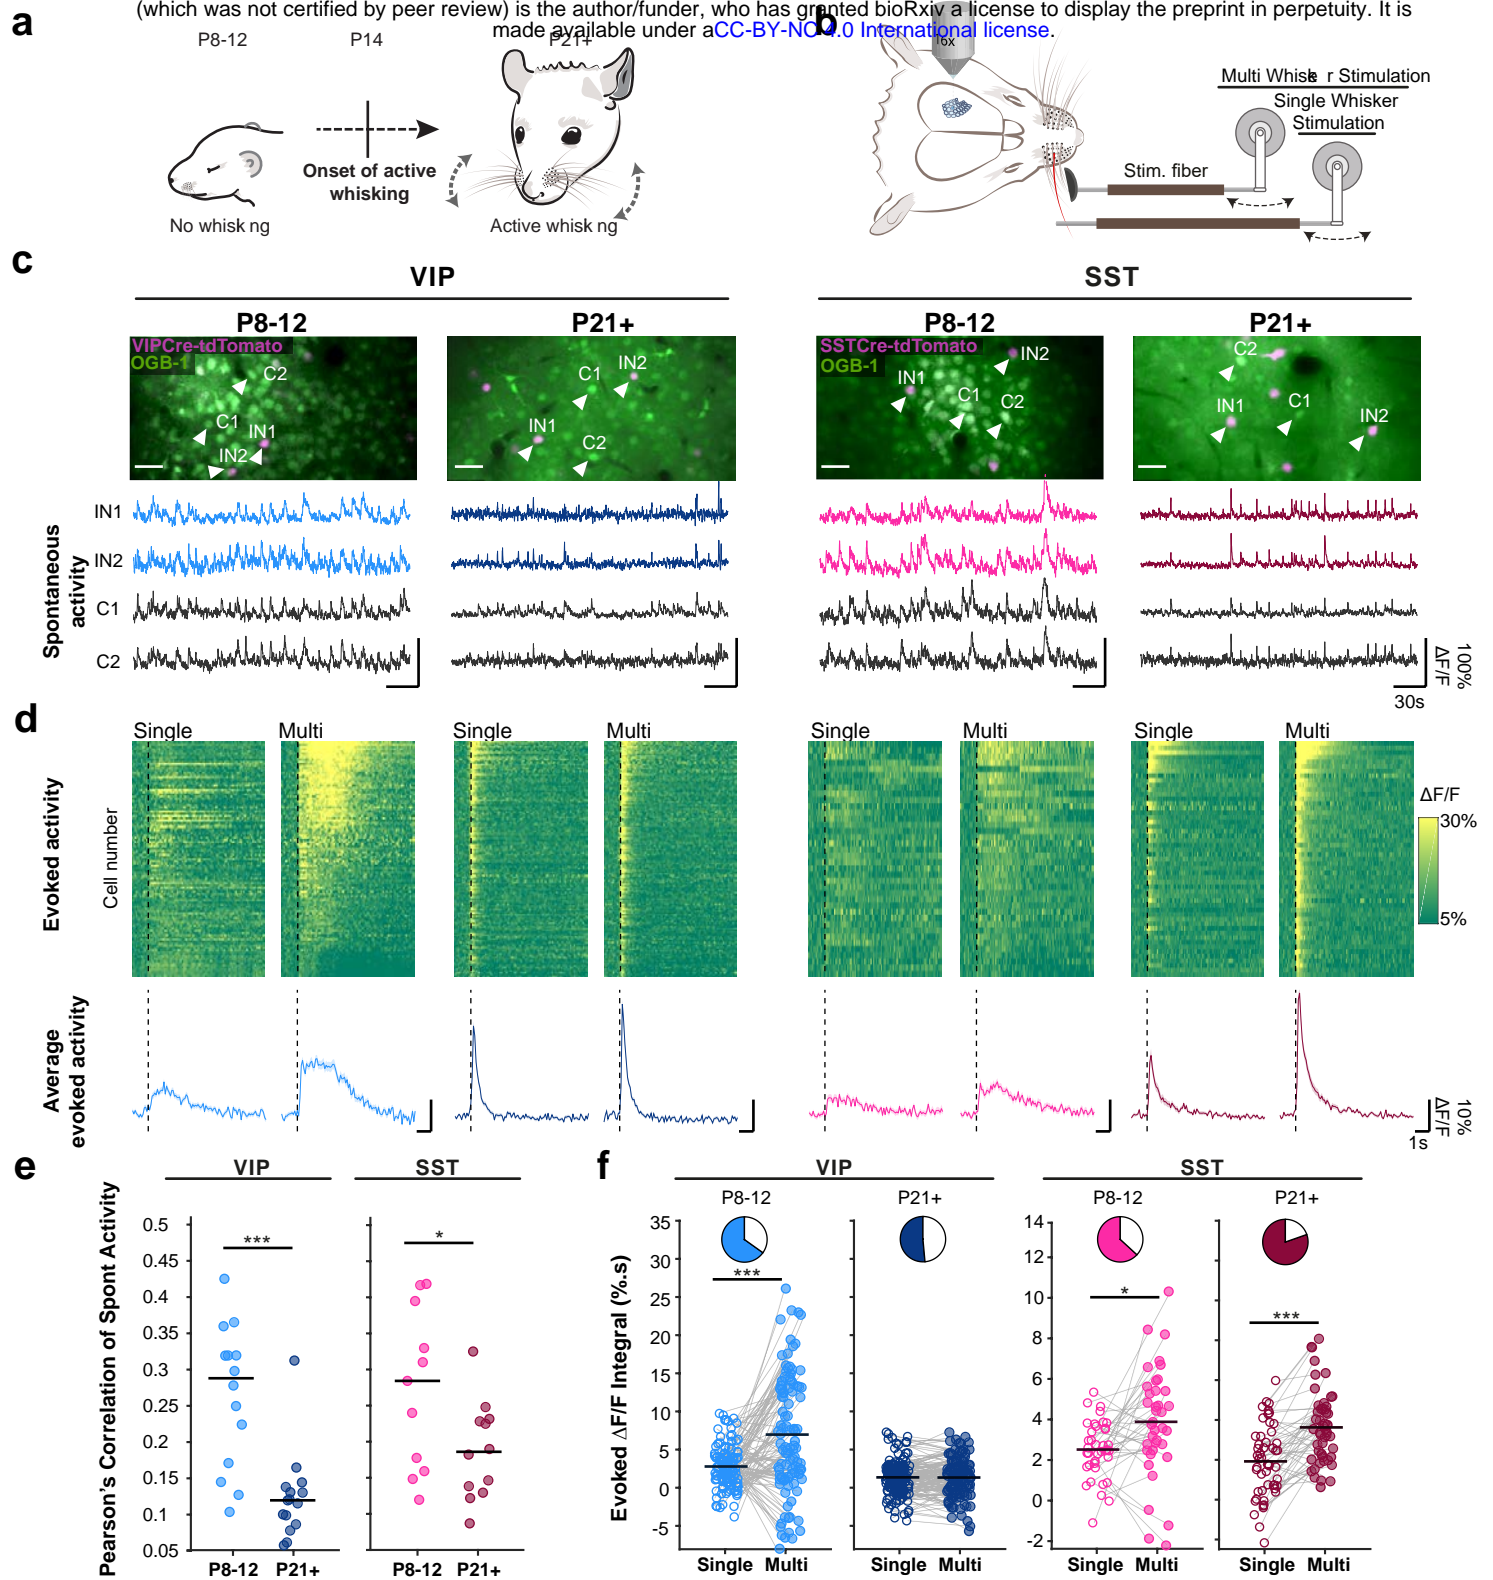

**Figure 1: Divergent sensory stimulus responses in superficial cortical VIP+ and SST+ interneurons during development**

**(a)** Acute in-vivo two-photon  $Ca^{2+}$  imaging was performed before (P8-12) and after (P21+) the start of active whisking. **(b)** Schematic representation of whisker stimulation protocol. **(c)** Top : average intensity projection of calcium imaging regions after bulk loading of OGB-1 (green). Interneurons are labeled with tdTomato using reporter mouse lines; scale bar 35  $\mu$ m. Bottom: representative examples of raw  $\Delta F/F$  traces of spontaneous activity of two interneurons (IN1,2) and two surrounding cells (C1,2). **(d)** Top:  $\Delta F/F$  signal over time of all recorded VIP and SST cells after whisker stimulation.  $Ca^{2+}$  responses are baseline corrected and aligned to whisker stimulus onset (dashed line). Cells are sorted by their cumulative activity following multi-whisker stimulation. (N=3 animals per group, VIP P8-12:109 cells, SST P8-12: 38 cells, VIP P21+: 138 cells, SST P21+: 51 cells) Bottom: Average  $\Delta F/F$  responses with SEM. **(e)** Pearson's correlations of spontaneous neuronal activity within each interneuron type before- and after P14. Same number of cells are included as in d) but the data is plotted by imaging spot. **(f)** Average of the evoked  $\Delta F/F$  integral after single and multi whisker stimulation. Pie charts show the fraction of cells that increase (coloured) or decrease (white) in activity by multi vs. single whisker stimulation (N=3 animals per group, VIP P8-12:109 cells, SST P8-12: 38 cells, VIP P21+: 138 cells, SST P21+: 51 cells). Statistics: e) Mann-Whitney U test, f) paired Wilcoxon-signed-rank test (\* $p < 0.05$ , \*\* $p < 0.01$ , \*\*\* $p < 0.001$ ).



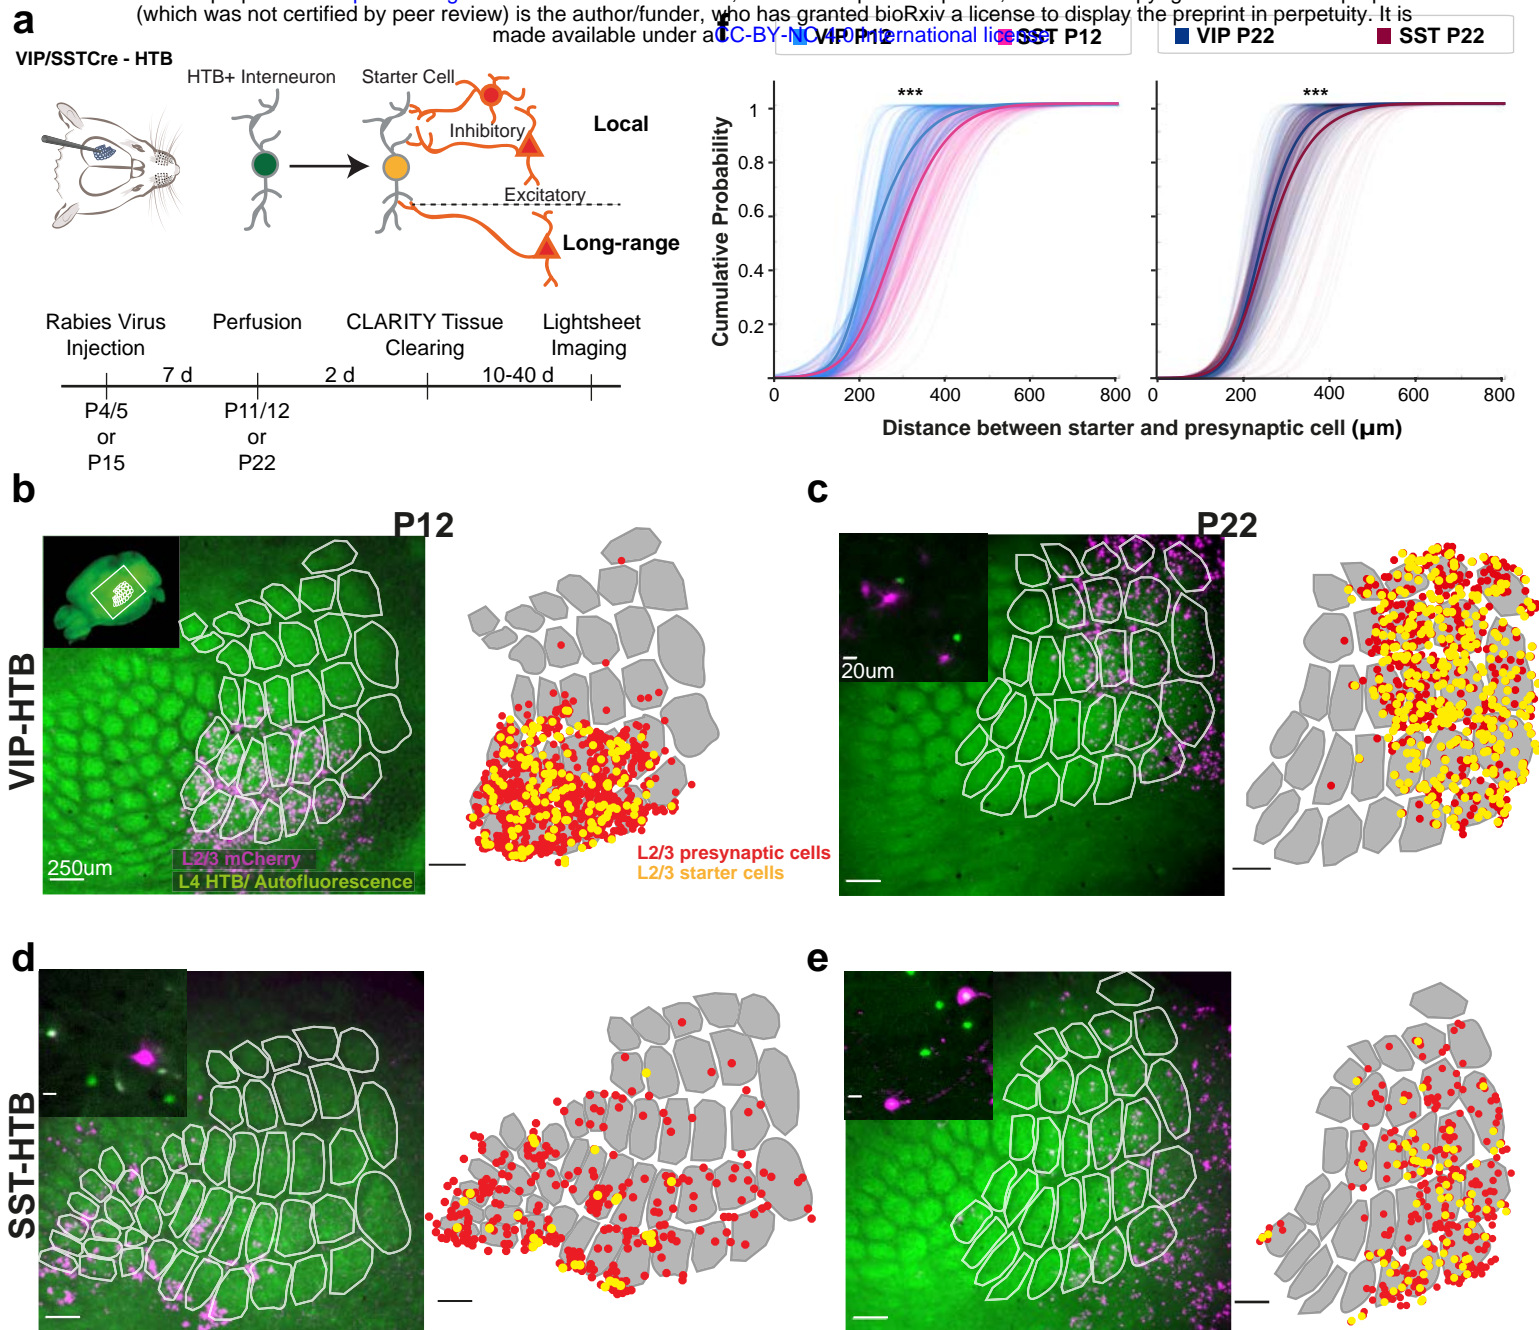

**Figure 2: Superficial VIP+ and SST+ interneurons show distinct barrel-field afferent connectivity motifs**

**(a)** Schematic representation of the experimental protocol. Rabies virus tracing was combined with tissue clearing and whole brain imaging **(b-e)** Left: Overlay of maximum intensity projection of L2/3 mCherry signal and median intensity projection of L4 autofluorescence after re-slicing of whole brain images. Right: Transformation applied before distance analysis. Segmented barrels overlaid with L2/3 starter (yellow) and presynaptic (red) cells represented as dots. Inset in **(b)** indicates location of barrel field in the whole brain. Insets in **(c-e)** show close-ups of rabies labelled neurons. **(f)** Cumulative distribution of Euclidian distance in 2D between the starter cells and all presynaptic cells in a 800 µm radius around them. The faint lines in the background depict the distance distribution of each starter cell; the thicker lines depict the average. (VIP P12, N=4: 382 starter & 1943 presynaptic cells, SST P12, N=6: 102 starter & 581 presynaptic cells, VIP P22, N=5: 645 starter & 1561 presynaptic cells, SST P22, N=4: 110 starter & 504 presynaptic cells). Statistics: Kolmogorov-Smirnov Test (\*\*\*) $p < 0.001$ ).

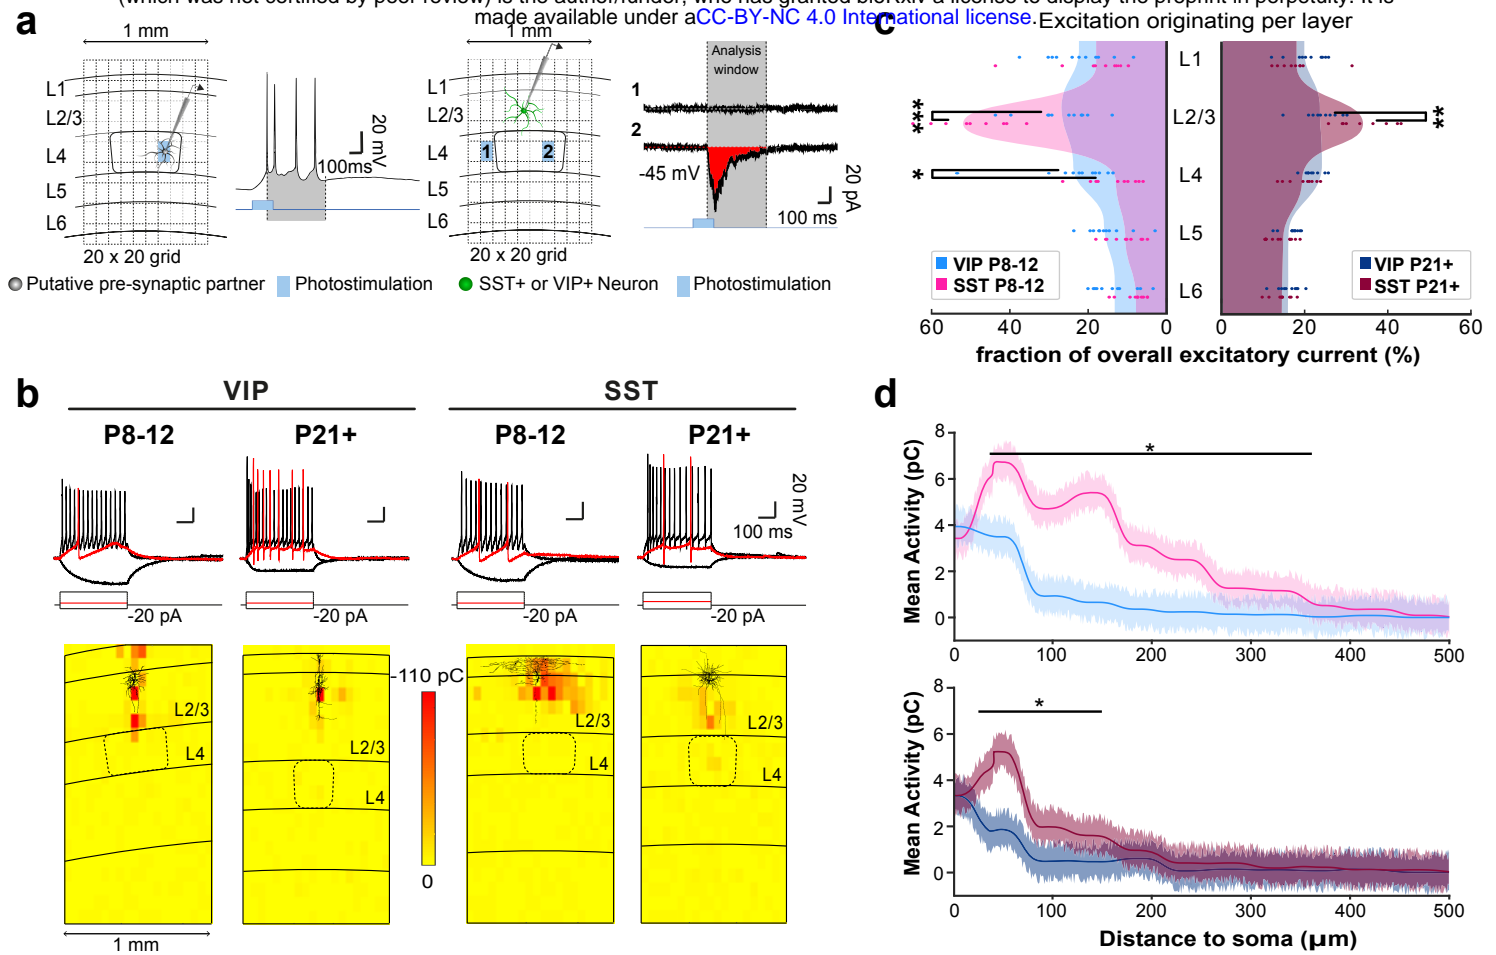

**Figure 3: Distinct functional connectivity motifs onto superficial VIP+ and SST+ cortical interneurons**

(a) Left: A graphic representation of photostimulation calibration with a patched putative pre-synaptic neuron within a neocortical slice indicated with layer boundaries (L1-6). Illumination calibration were done so that the paradigm successfully evoked a short train of APs in the putative pre-synaptic partners. AP discharge is displayed to the right, with the peak of the first AP until after the last AP creating a time-window used for future analysis of evoked currents. Right: schematic representation of photostimulation-based mapping of incoming currents onto interneurons through whole-cell patch-clamp recordings. Overlaid is a schematic of the 20x20 grid, indicating the quadrants that can be photostimulated. Two of the AP discharges of the interneuron is shown to the right, with one not eliciting (1) and one eliciting (2) a post-synaptic response. The time-window acquired during calibration is used to register and analyse the incoming currents. (b) Top: example traces of voltage responses to square hyperpolarizing and depolarizing current pulses,  $\Delta +20$ pA. Bottom: Heatplot representations of normalized evoked excitatory current integral (in pC), recorded over development (P8-12 and p21+) from VIP+ (left) and SST+ (right) interneurons while performing glutamate uncaging in a grid pattern. (c) Plot of excitatory input onto VIP+ and SST+ cells (individual dots) averaged per lamina and normalized to average overall excitation within the field of view. The grand average of all cells per group is depicted as a continuous filled wave and compared within age groups. One data point has been excluded for illustration purposes only. (d) Mean evoked excitation originating from within L1-3 and plotted as a function of lateral distance from either side of the recorded cells somata. (VIP P8-12: 10 cells, SST P8-12: 10 cells, VIP P21+: 10 cells SST P21+: 9 cells) Statistics: Mann-Whitney U test for c) and two tailed t-test for d) (\* $p < 0.05$ , \*\* $p < 0.01$ , \*\*\* $p < 0.001$ )



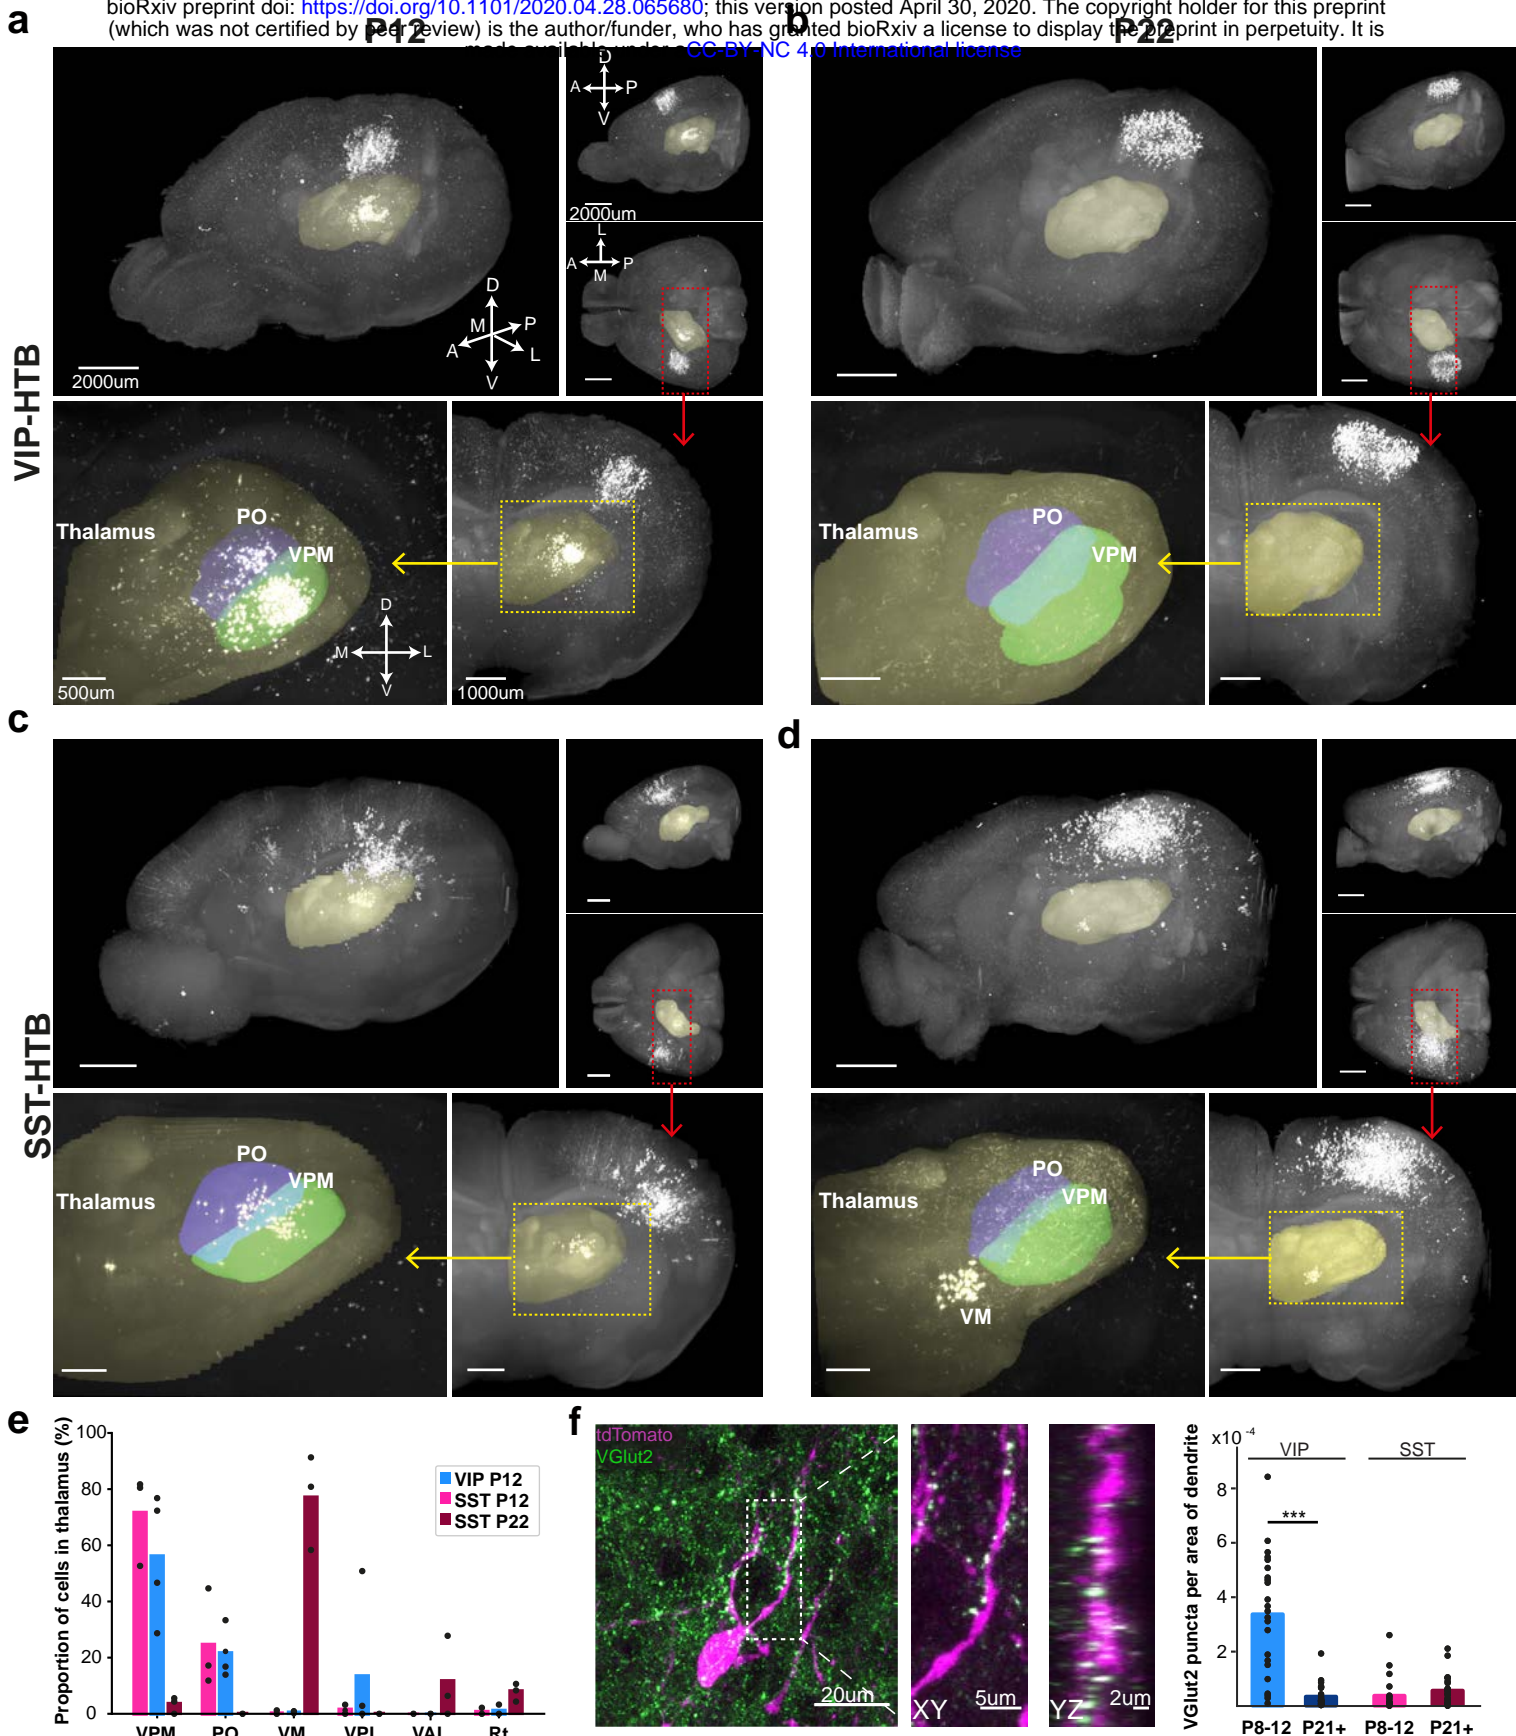

**Figure 4: Rearrangement of thalamic inputs onto superficial VIP+ and SST+ interneurons during development.**

**(a-d)** Top panel: representative examples of cleared rabies injected brains seen from an oblique, top-down and side angle. The thalamus is highlighted in yellow. Red square indicates the area projected in bottom panel. Bottom panel: Coronal view of maximum intensity projection of the thalamus. Left: Overview. Right: zoom-in with VPM (green) and PO (blue) highlighted. **(e)** Quantification of pre-synaptic cells in different thalamic nuclei normalized to the total number of cells in the thalamus. VIP P22 is not included because no cells were found in the thalamus (N=3 brains for SST; N=4 brains for VIP P12). **(f)** Example of VGlut2 staining (green) in L2/3 of a wS1 section from a VIPCre-tdtomato animal at P9. The dotted square indicates the zoomed in part on the right, which shows a close-up of puncta appositions in xy and yz direction. Graph shows quantification of VGlut2 puncta on tdtomato-positive dendrites. The number of appositions in every picture is normalized to the area of tdtomato positive dendrites in the same picture. (N=3 brains per group; SST P21+: 28 images, rest: 26 images. Statistics: Mann-Whitney U test (\*\*\*) $p < 0.001$ ).

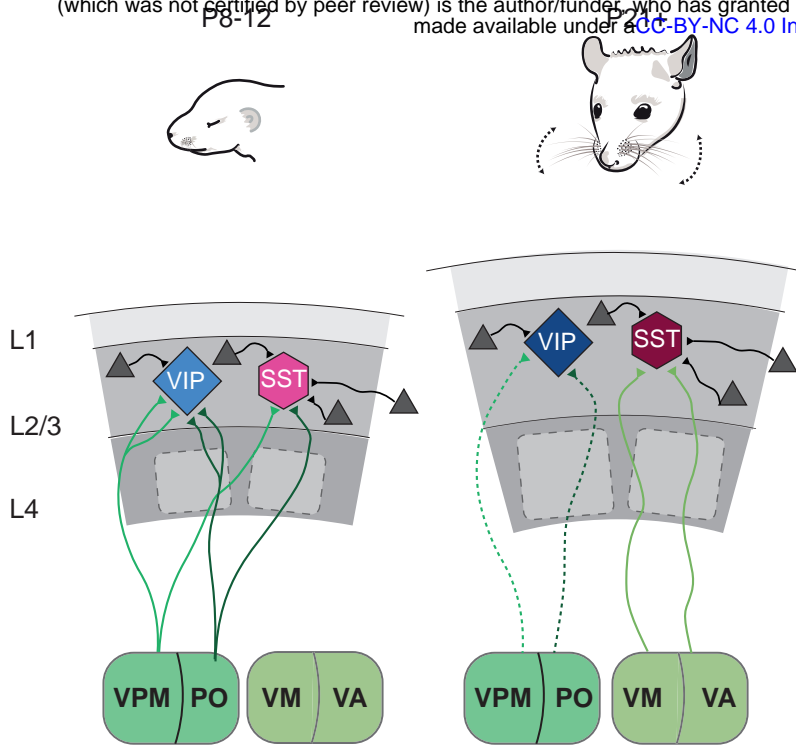

**Figure 5: Schematic of developmental input rearrangement onto superficial VIP+ and SST+ interneurons.**

Local connectivity: SST+ interneurons receive excitatory inputs (grey triangles) from more distal source within the barrel cortex than VIP+ cells both before and after P14. Bottom-up inputs: Before P14 both VIP+ and SST+ cells receive the majority of their thalamic inputs from the VPM and PO nuclei of the thalamus, with the VIP+ cells showing more thalamic synapses on their dendrites. After P14 thalamic input onto VIP+ cells is strongly reduced while the input onto SST+ interneurons is shifted to the VM and VA thalamic nuclei.
